# Supplementary material
Source: publisher figshare collection journal article supplement (https://acs.figshare.com/ndownloader/files/4138207)

# Supporting Information

## **Oxidative Coupling of Indoles with Ethyl 2-(disubstituted amino)acetates: An Approach to Achieve Indolylglycine Derivatives**

Zhanwei Xu, Xiaoqiang Yu,\* Xiujuan Feng, Ming Bao\*

State Key Laboratory of Fine Chemicals, Dalian University of Technology, Dalian 116023, China

Table of Content

NMR Spectra

S2–S24

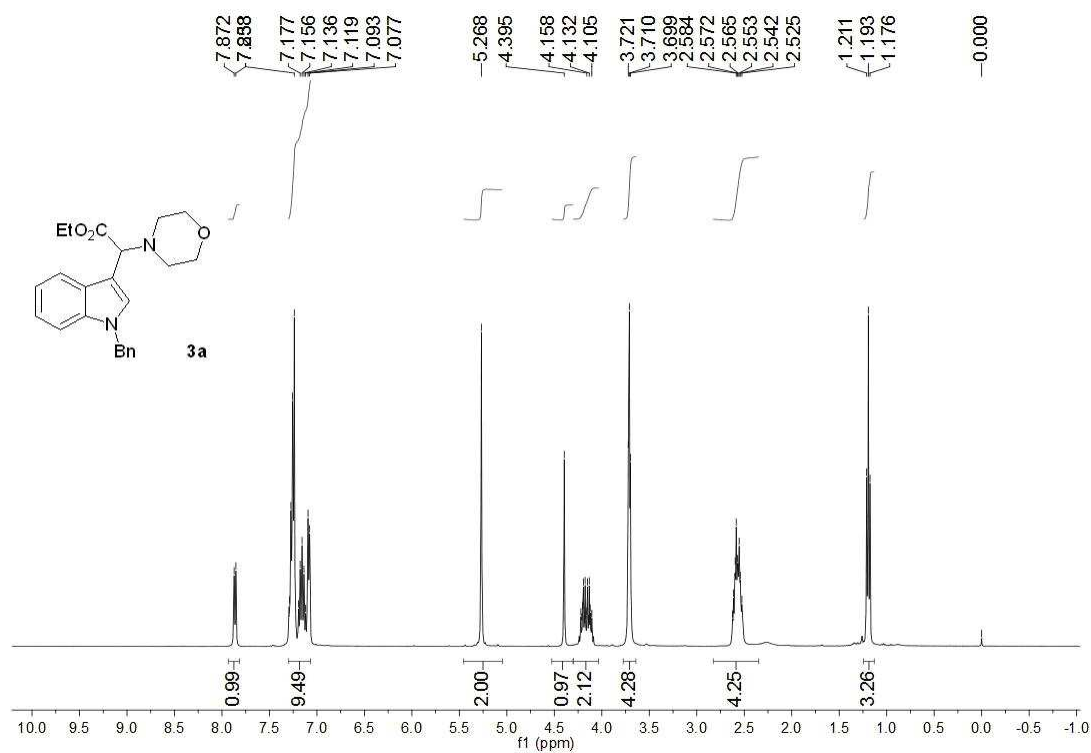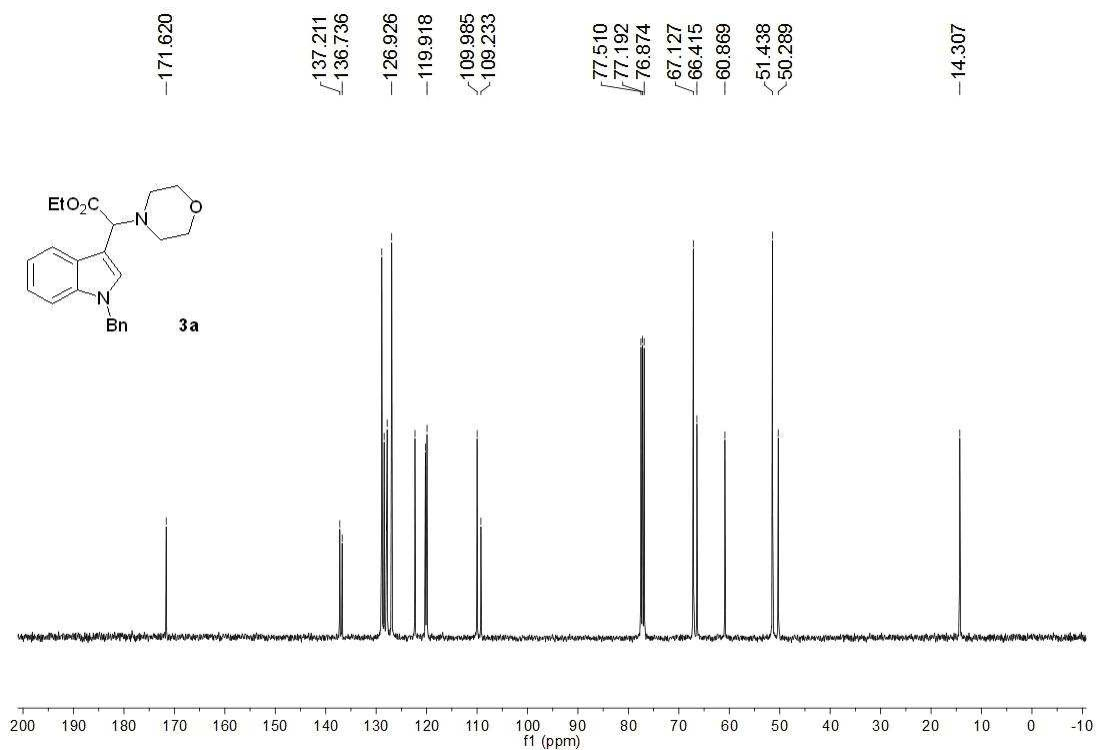

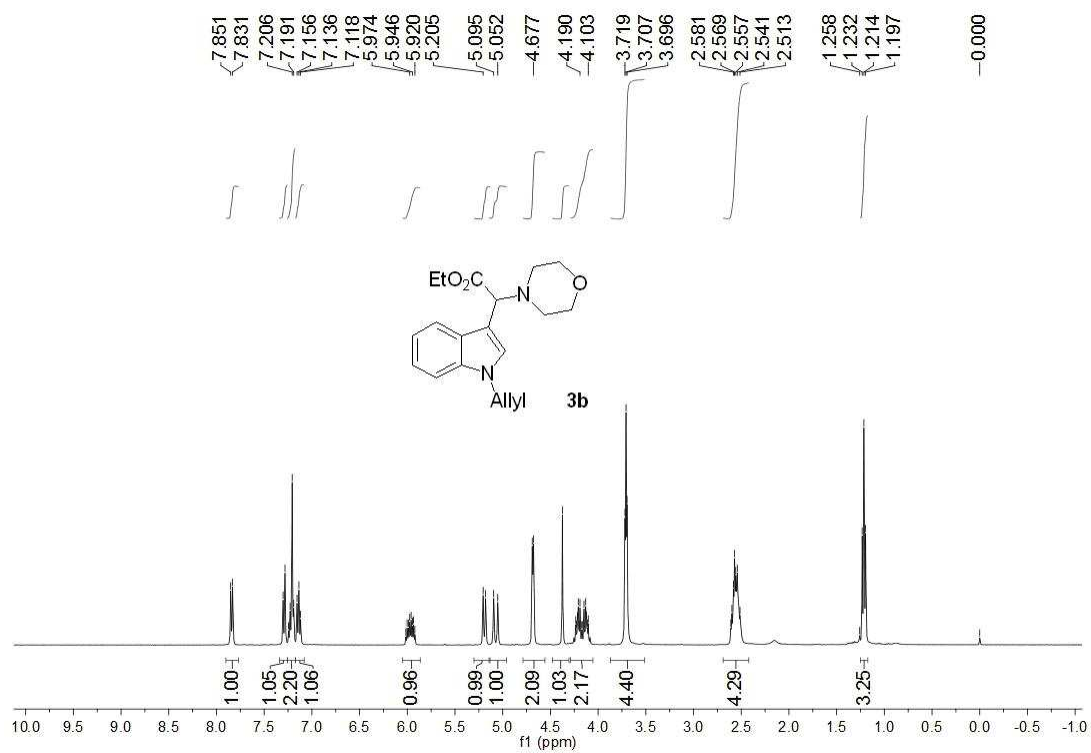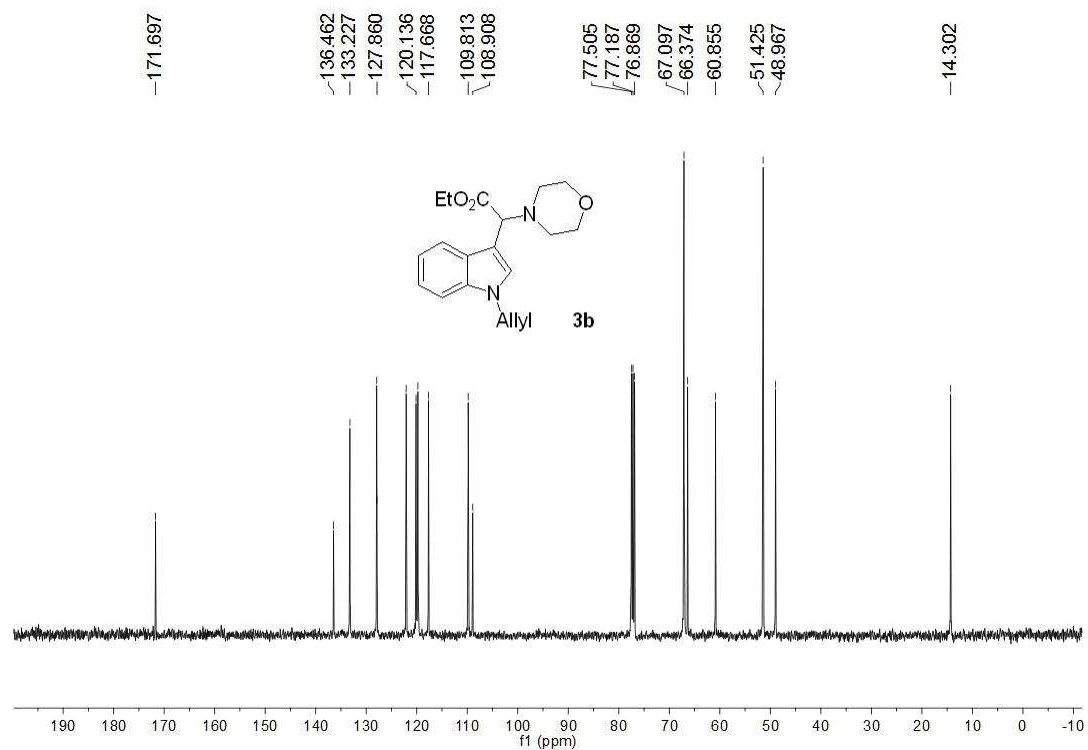

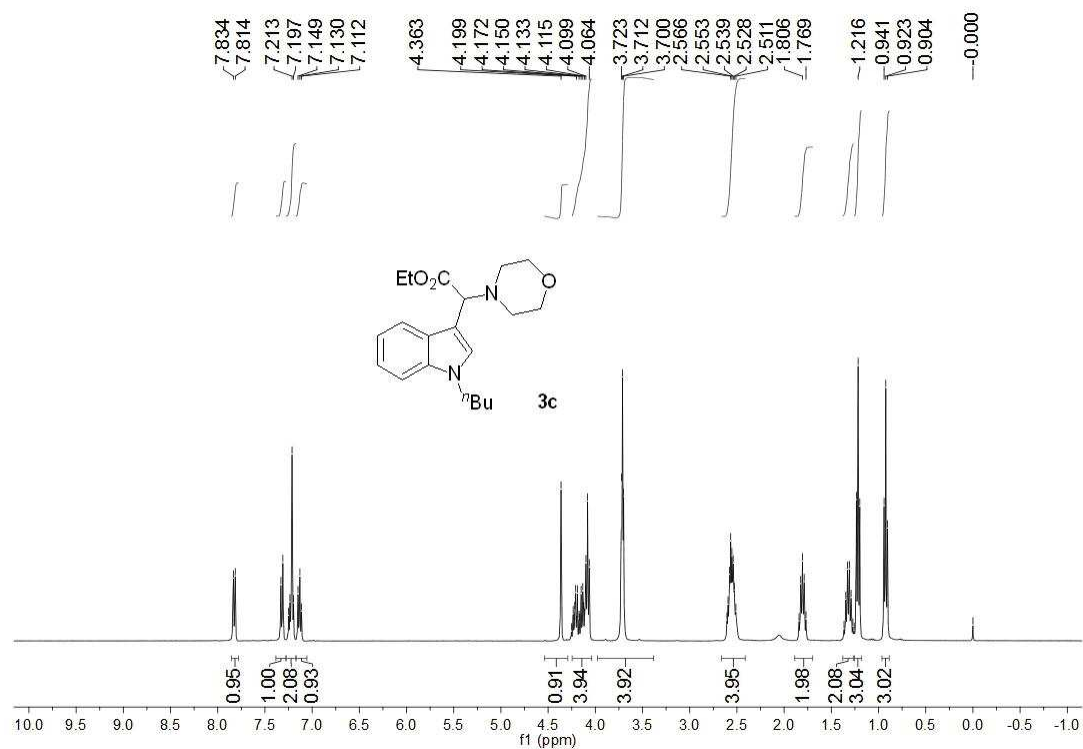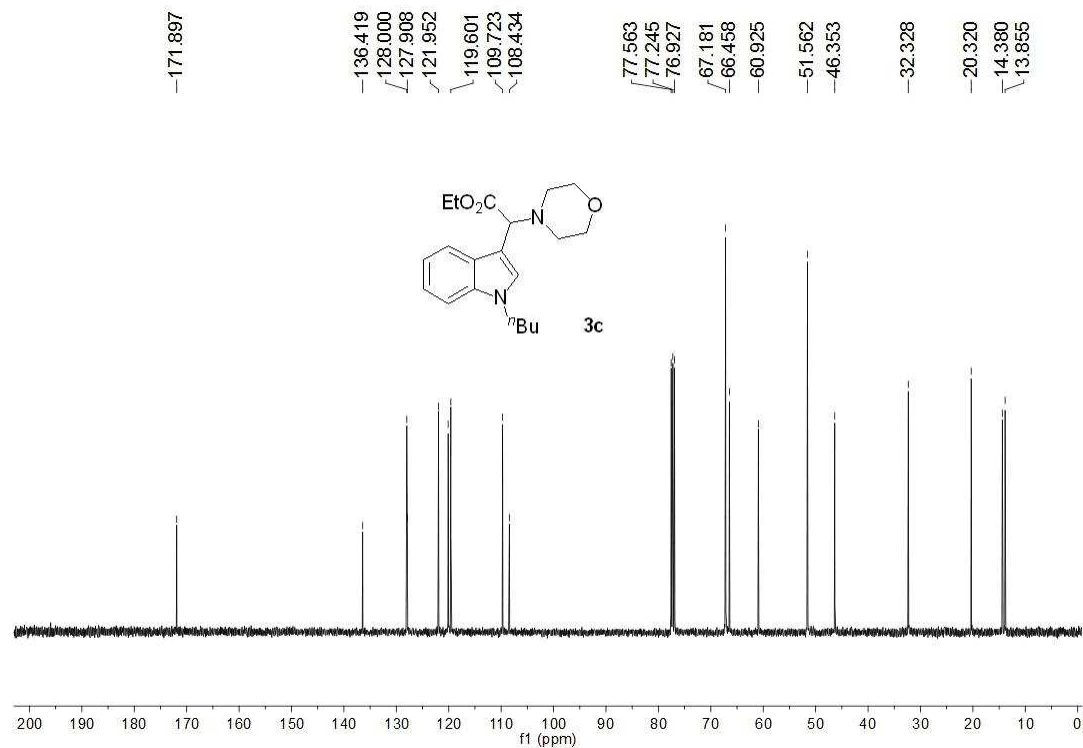

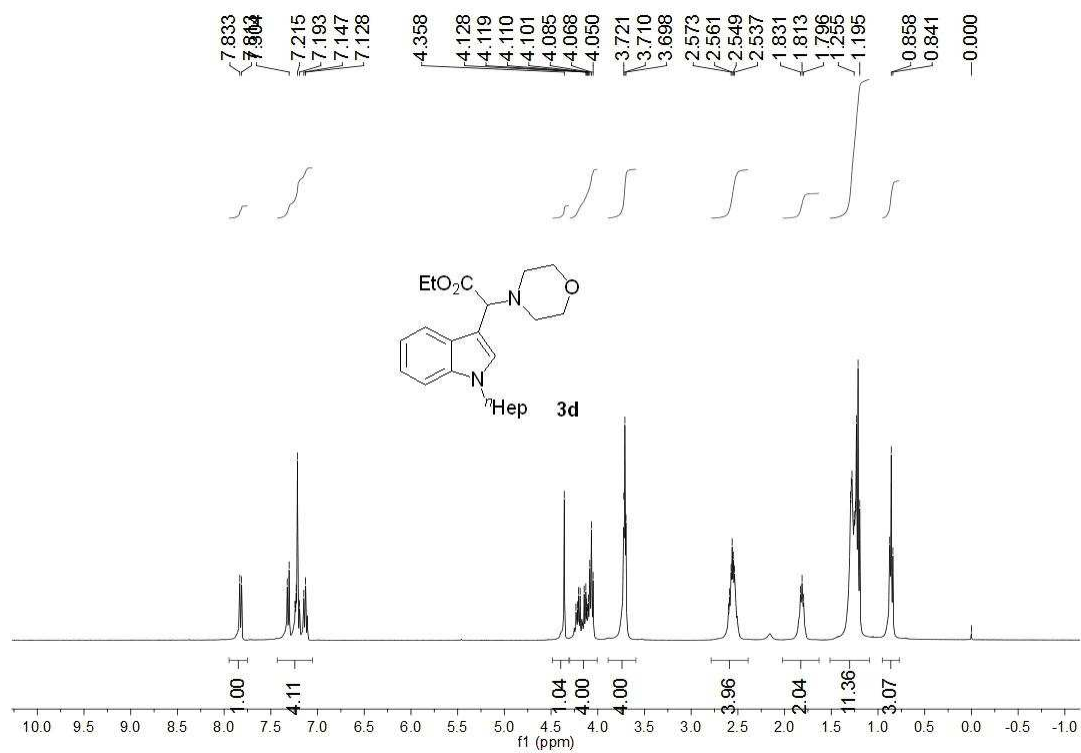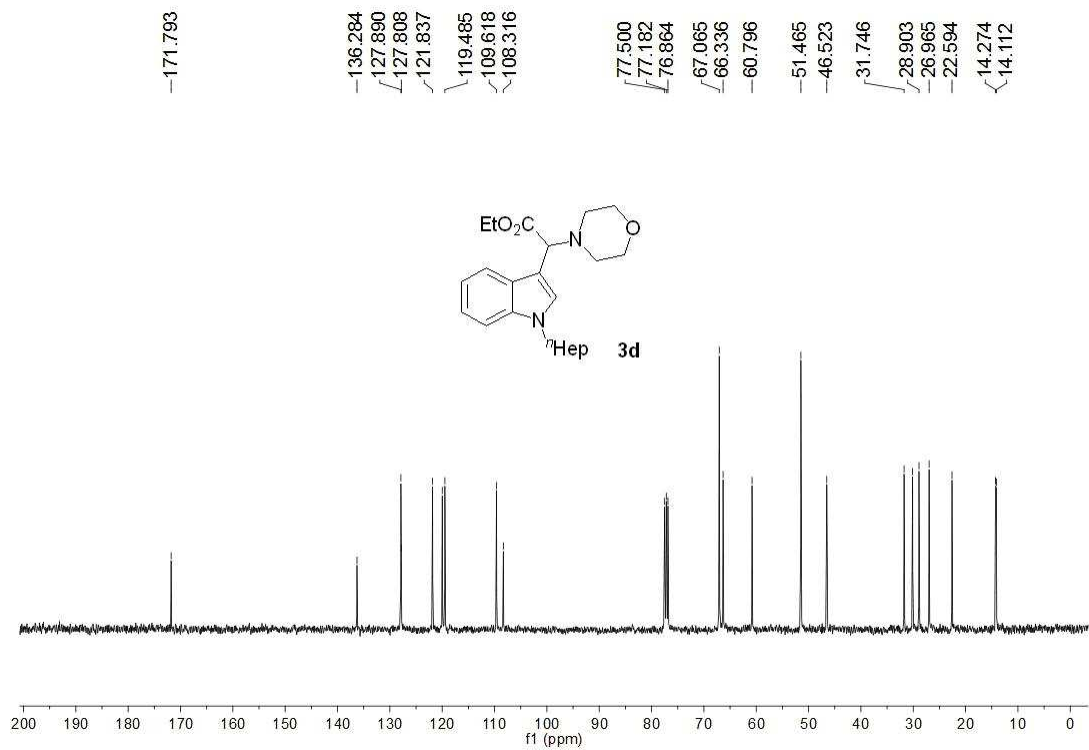

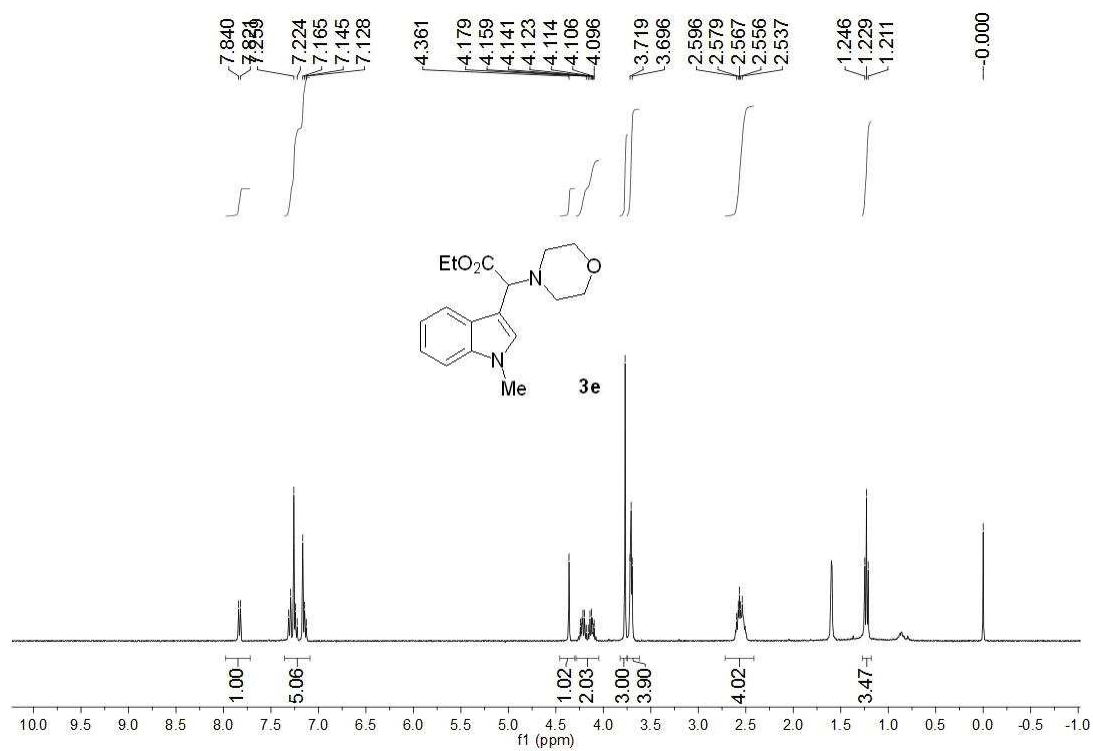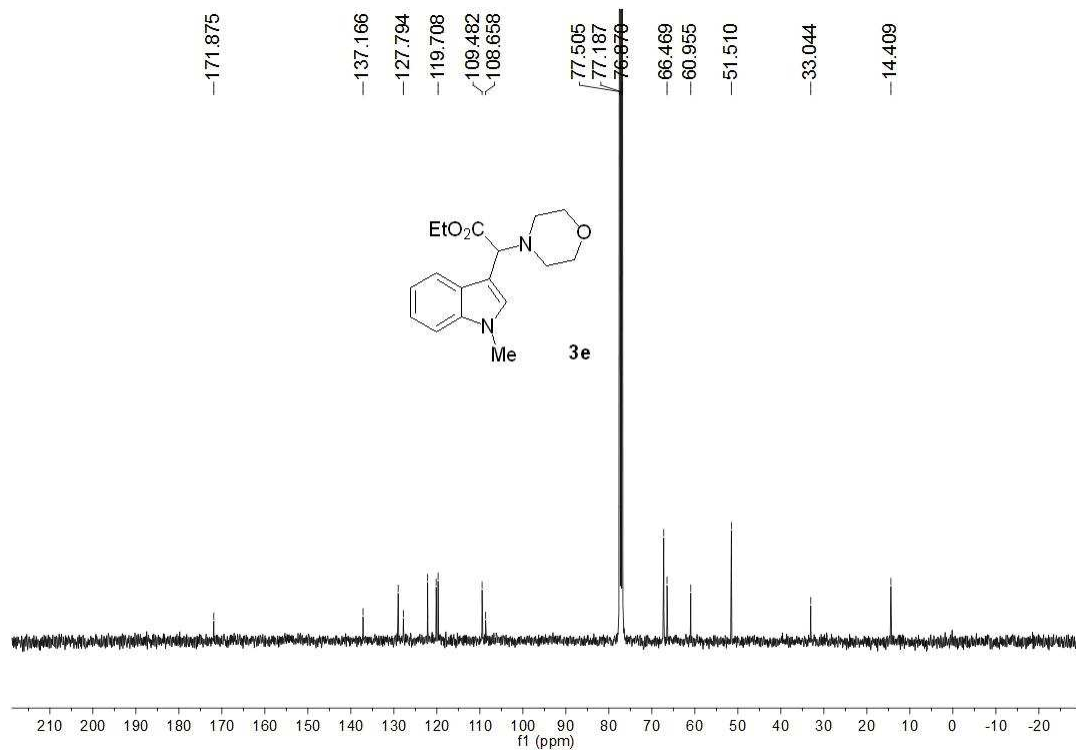

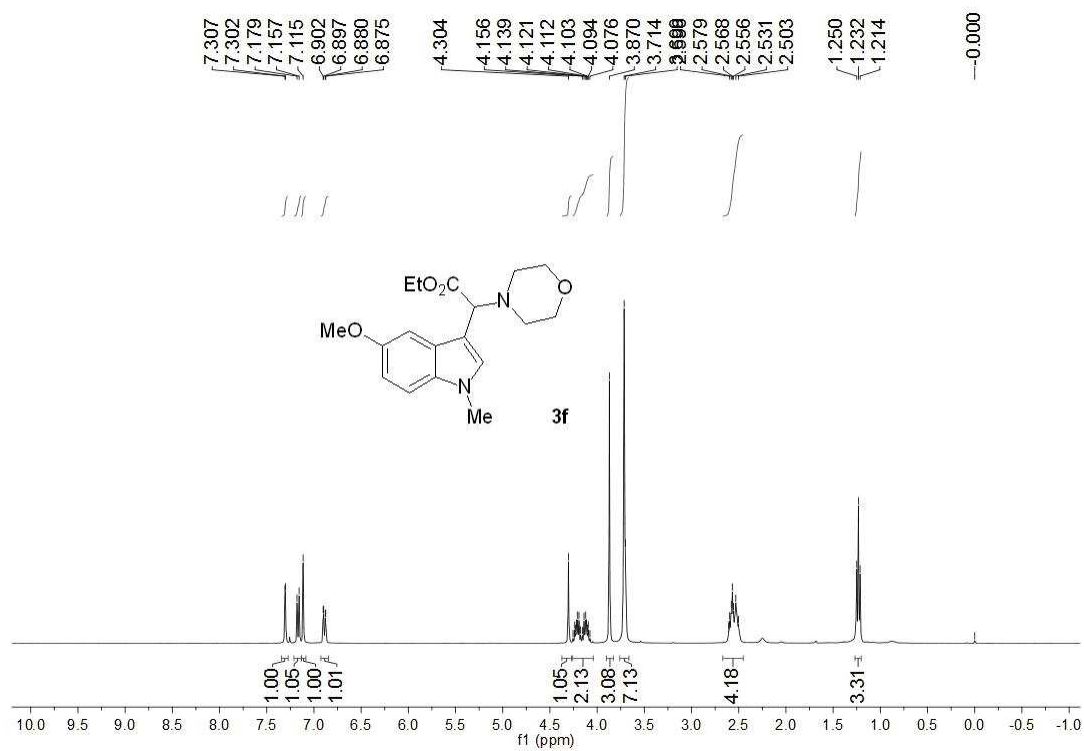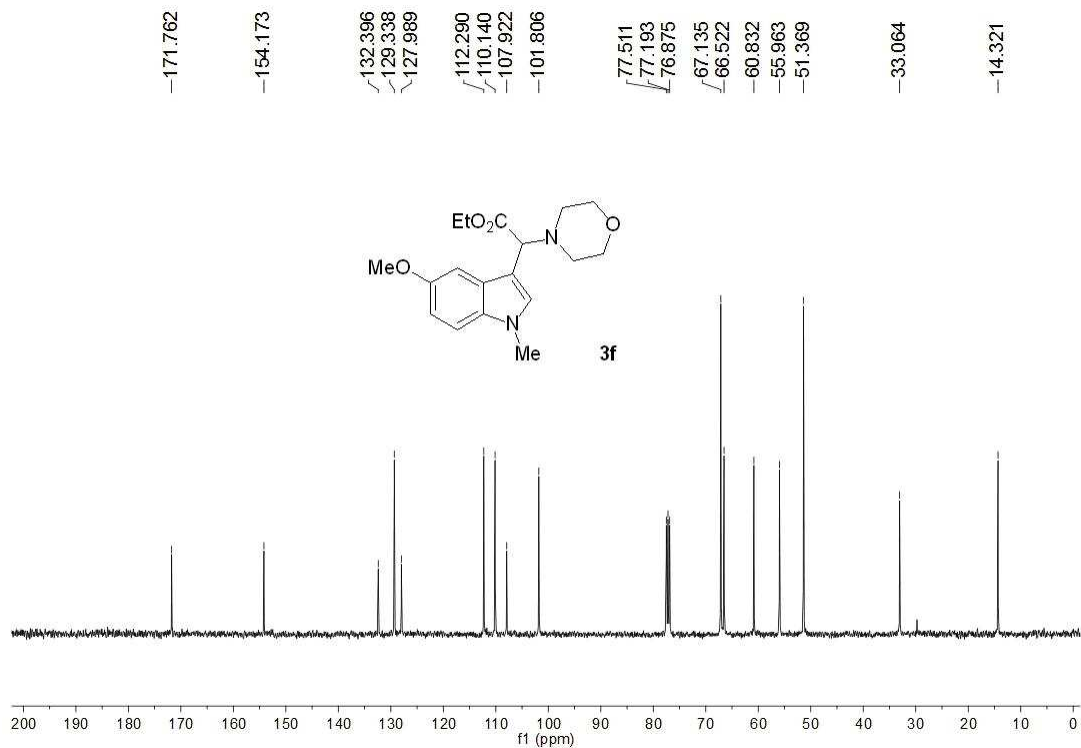

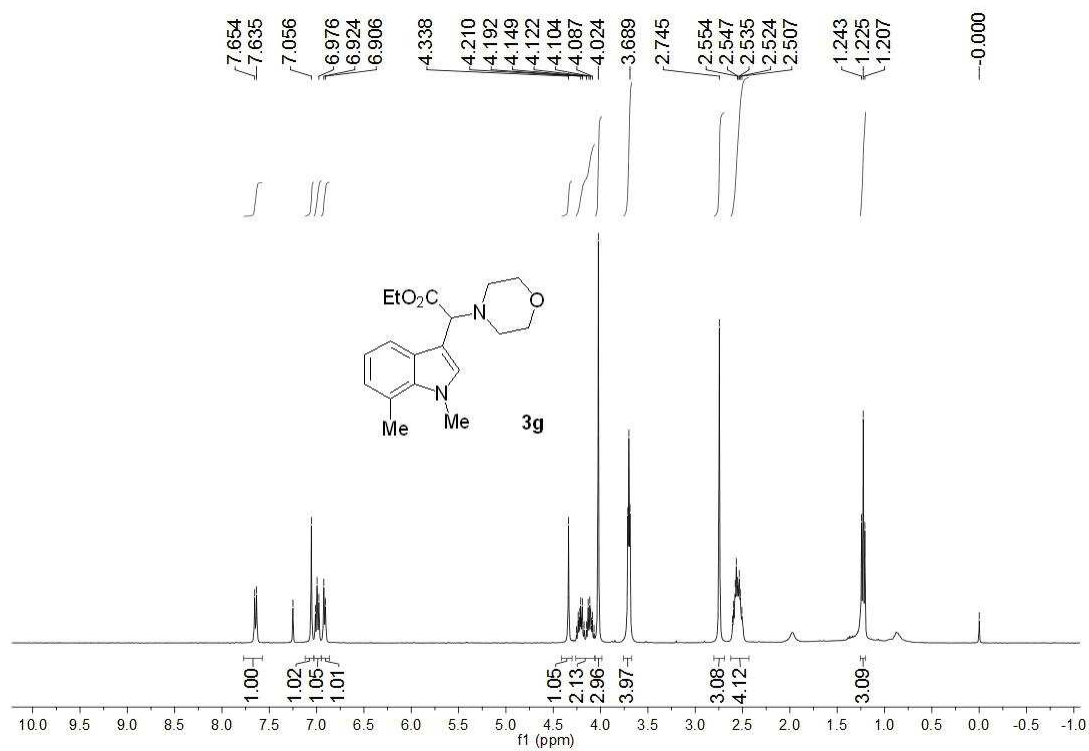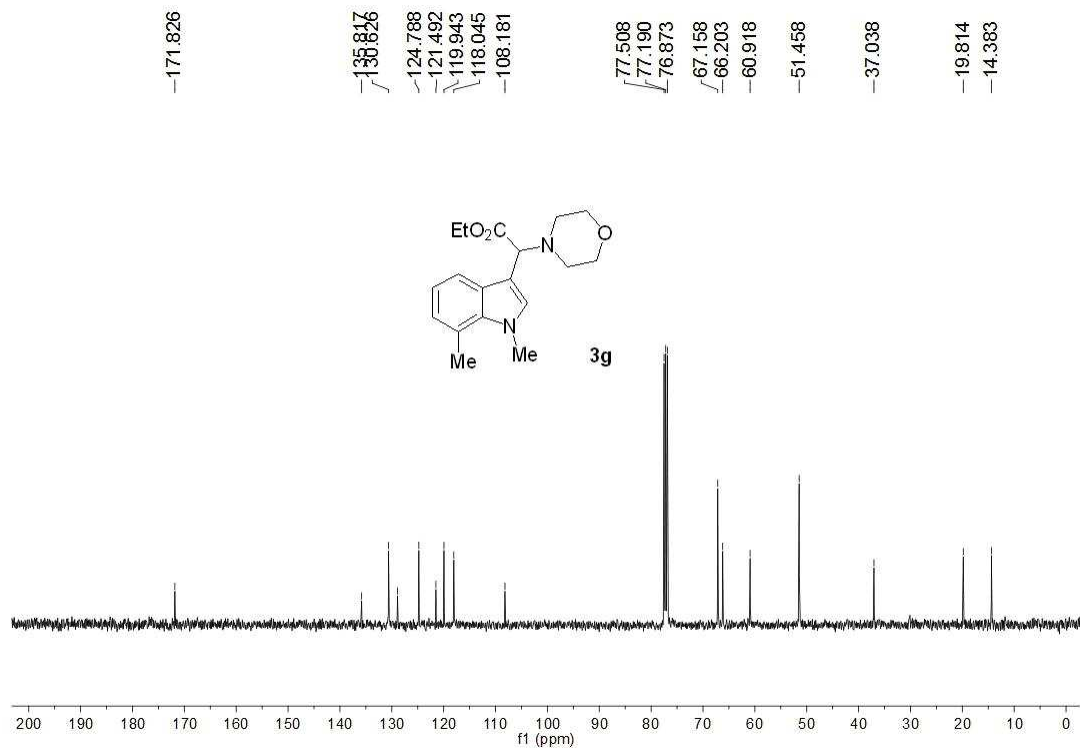



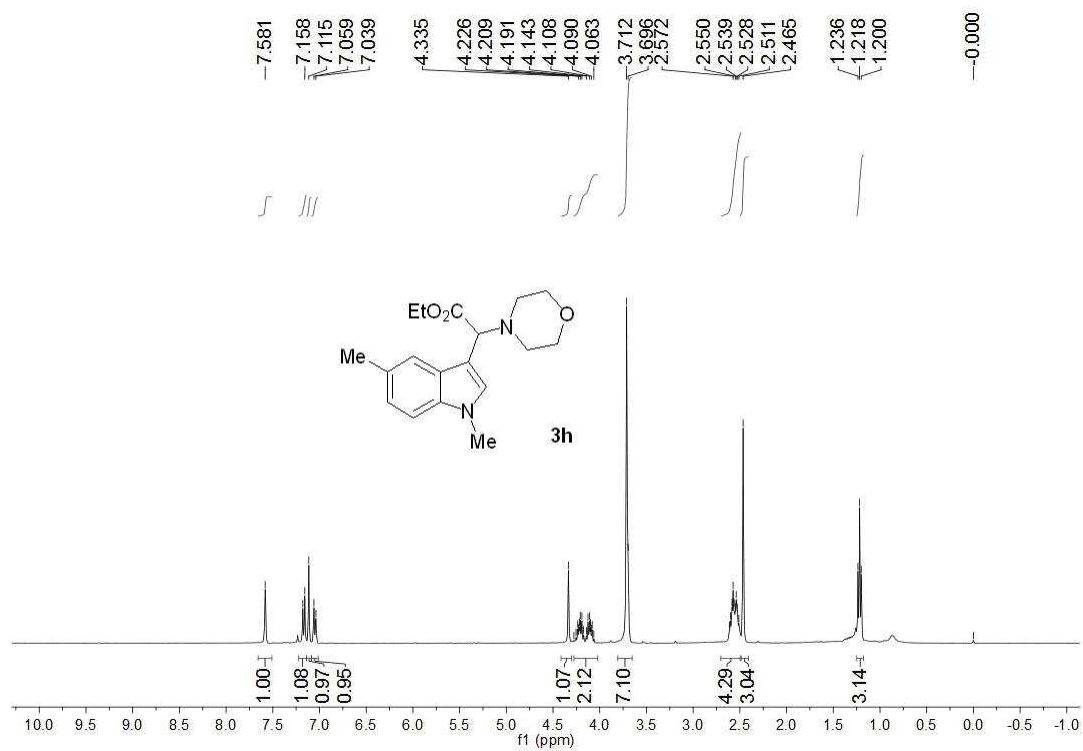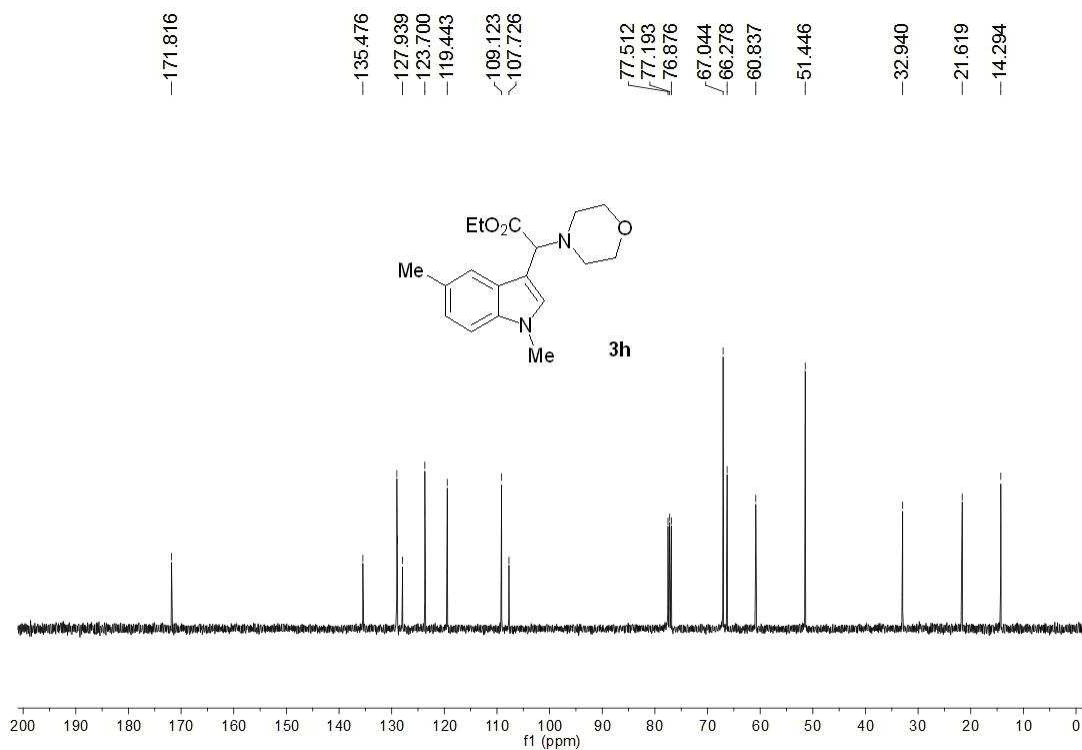

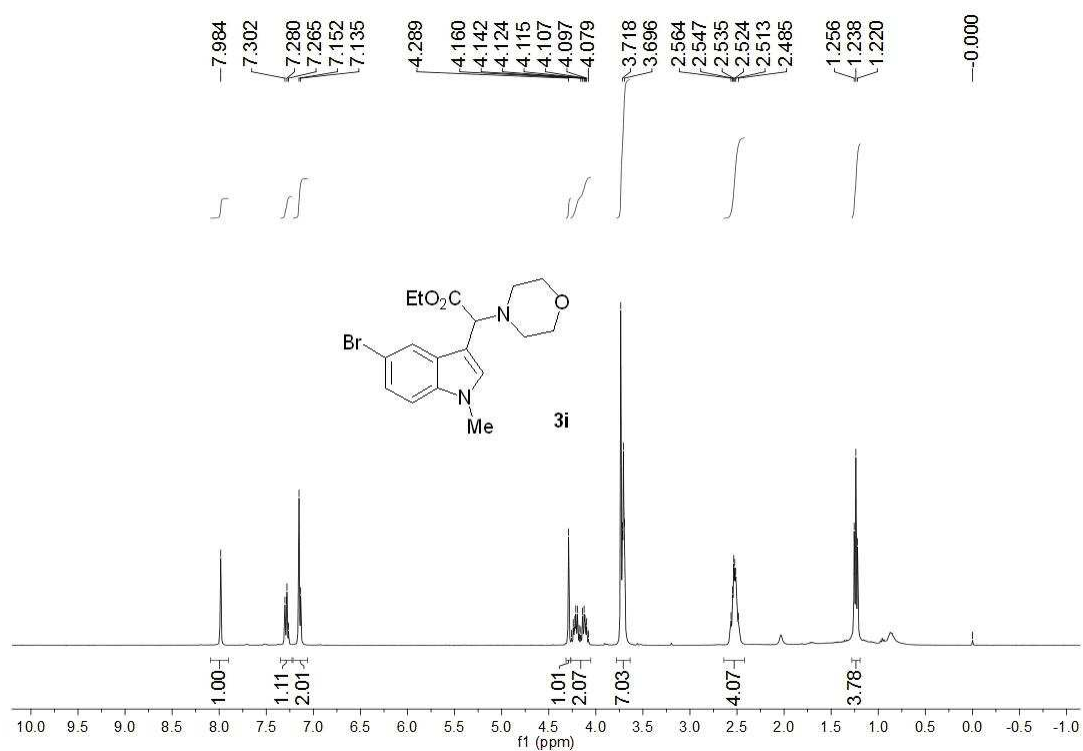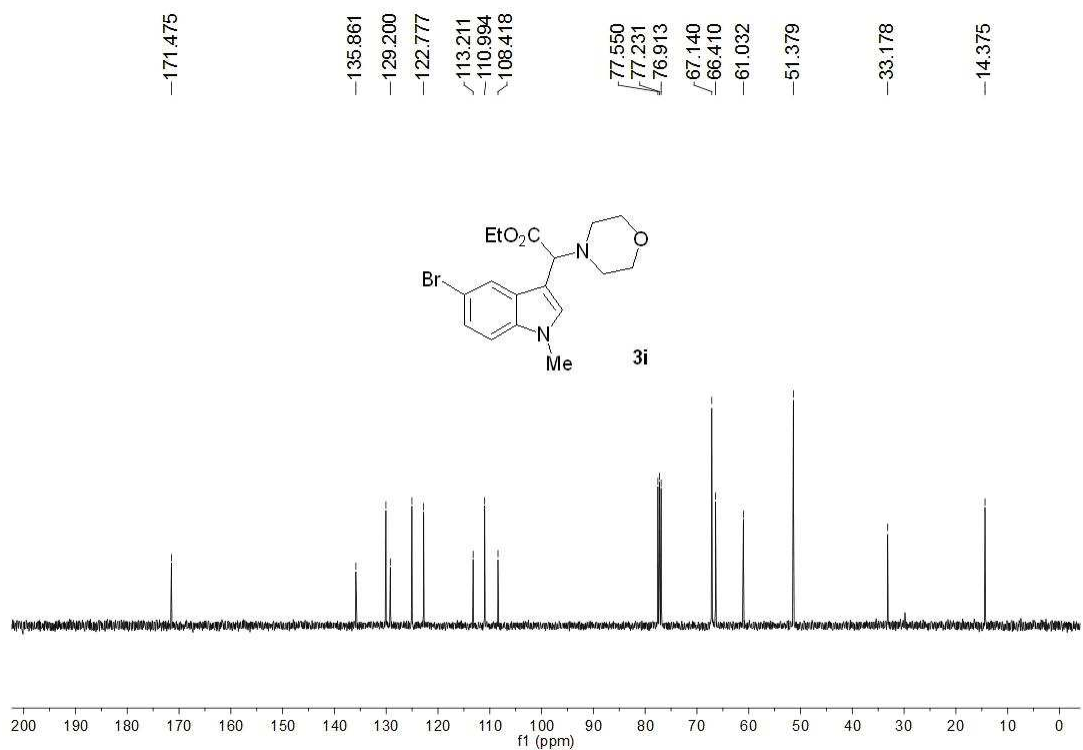

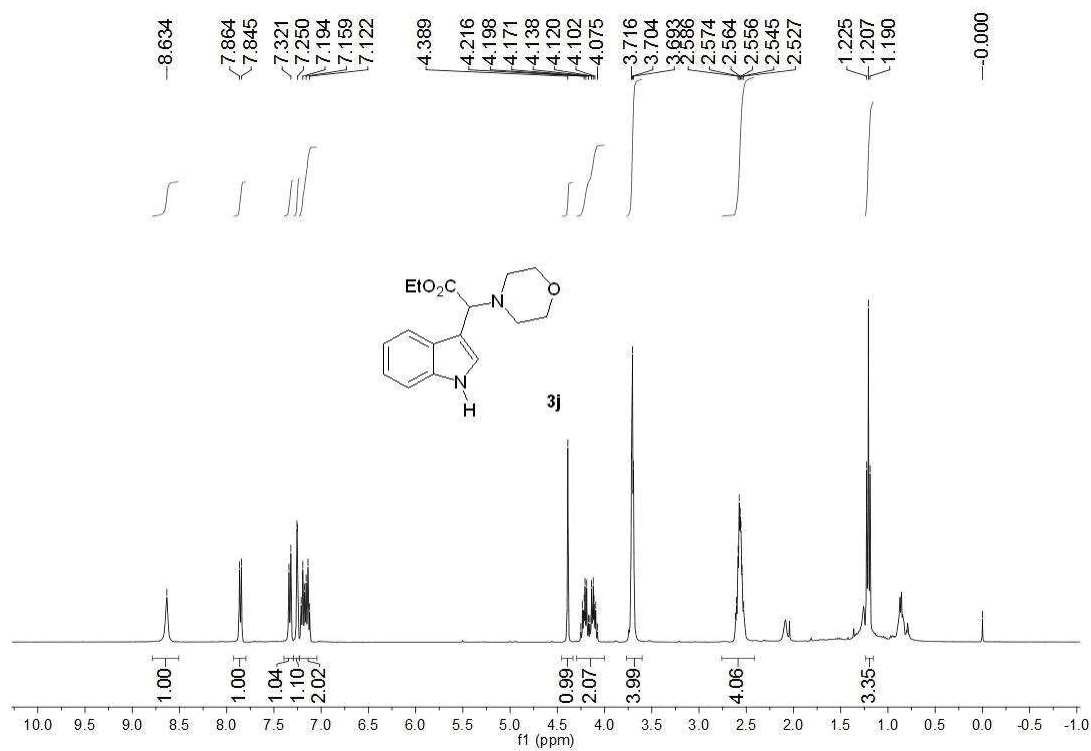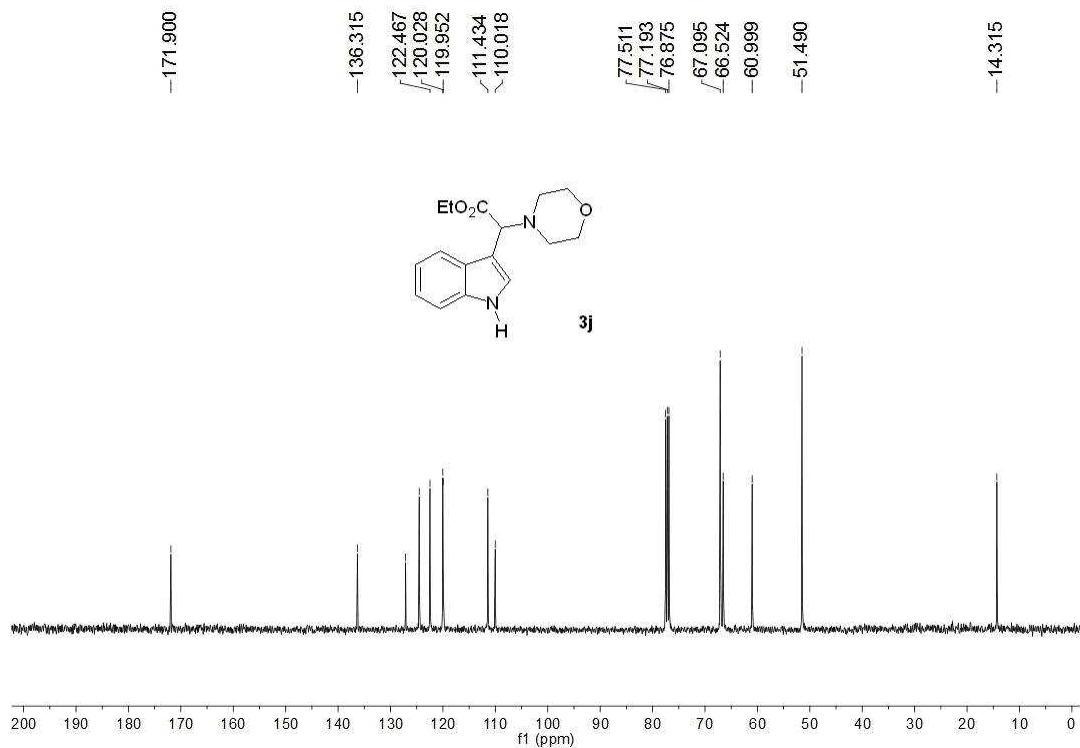

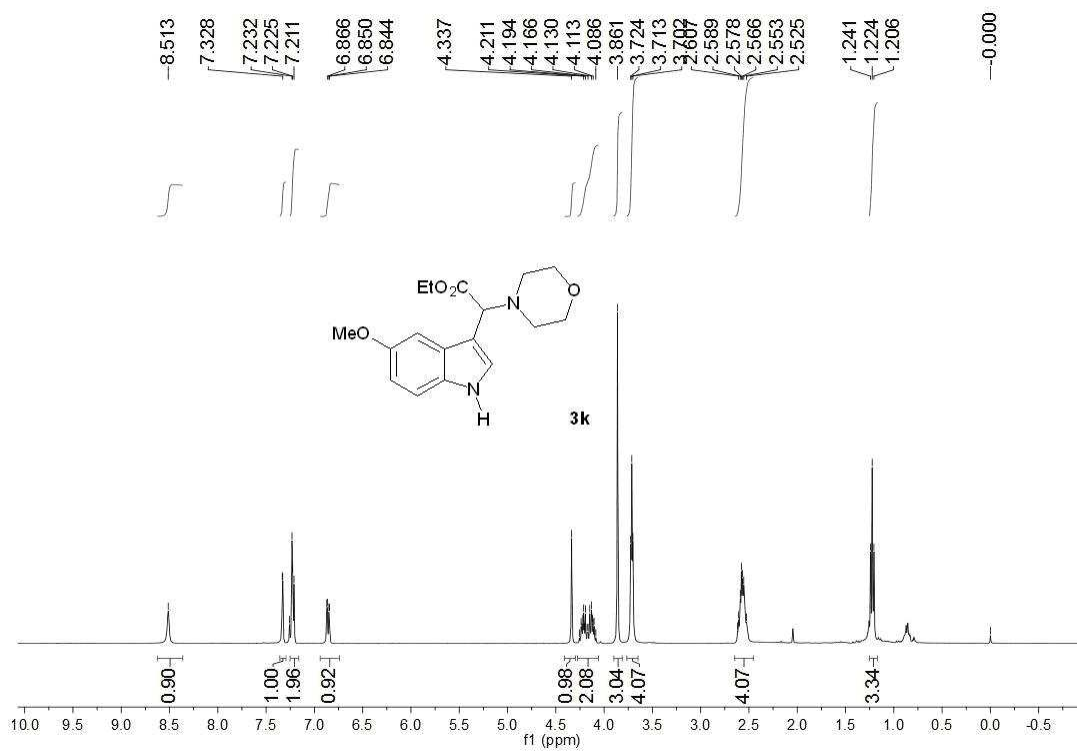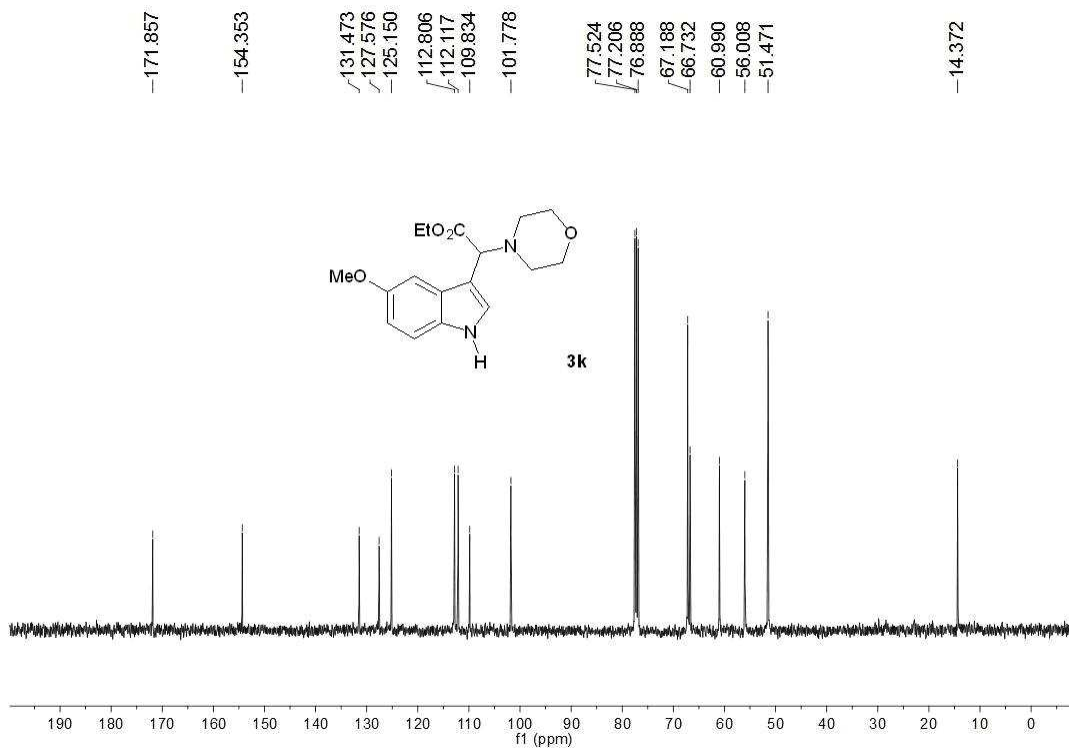

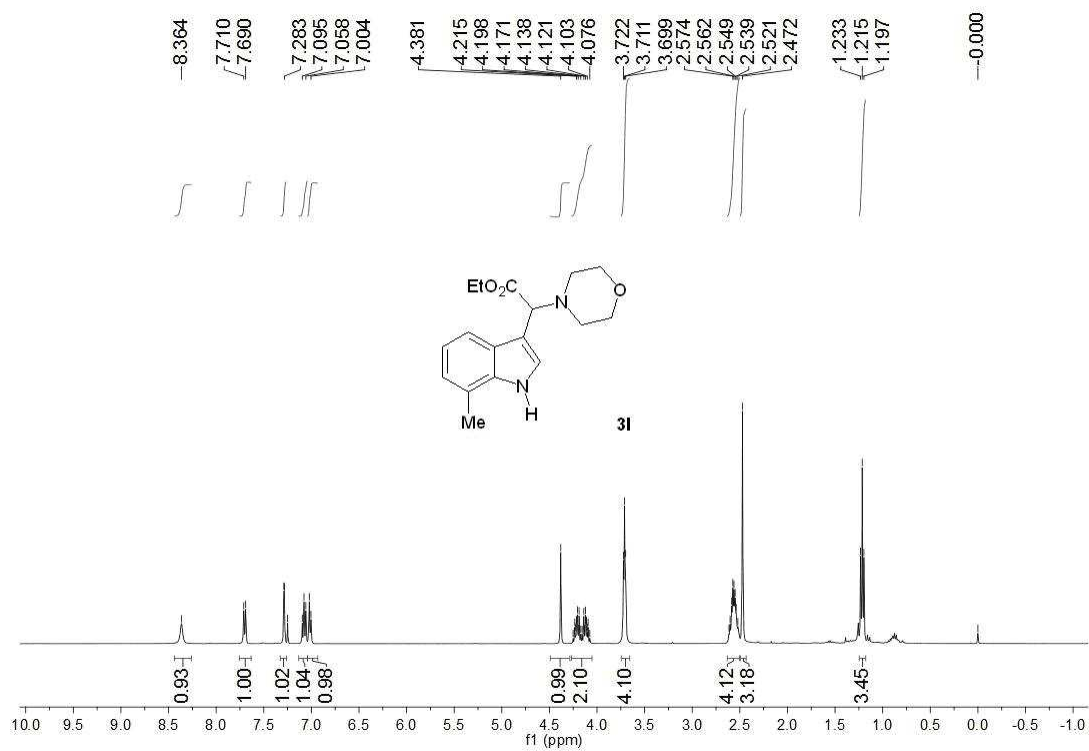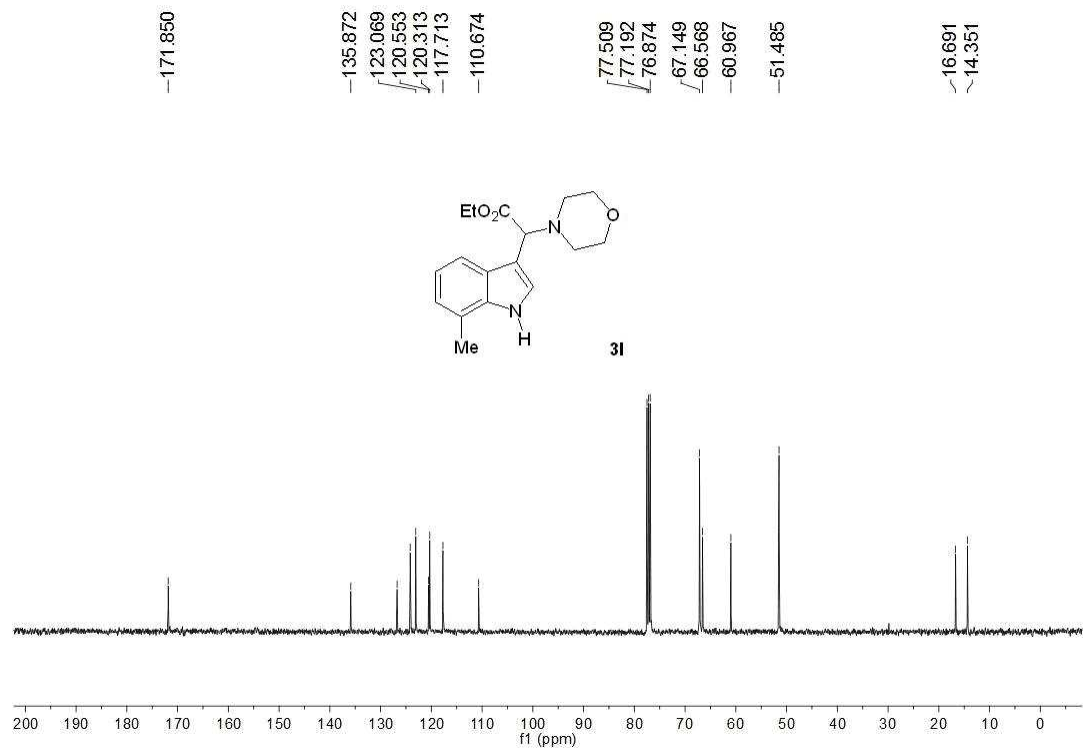

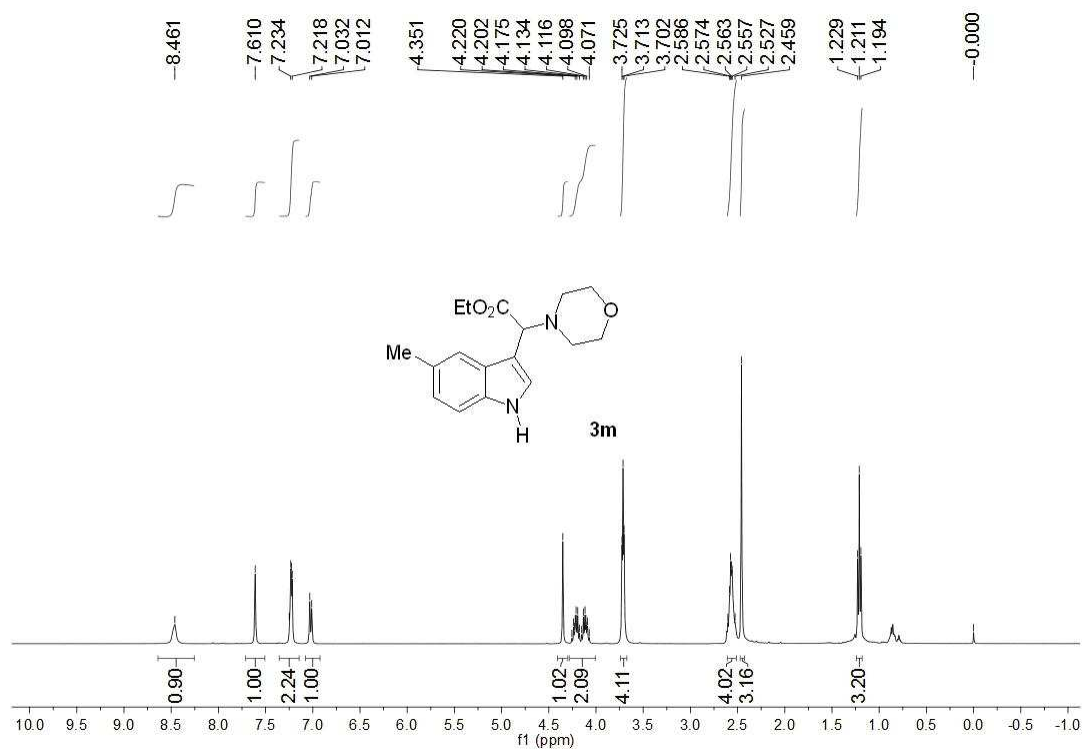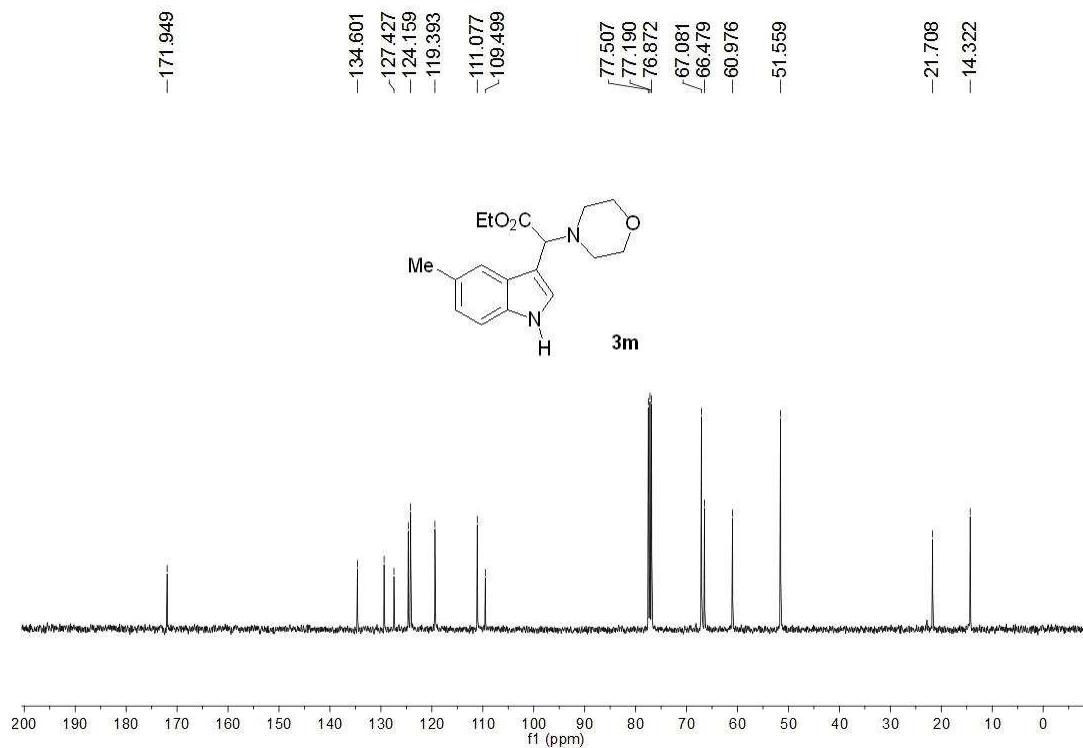

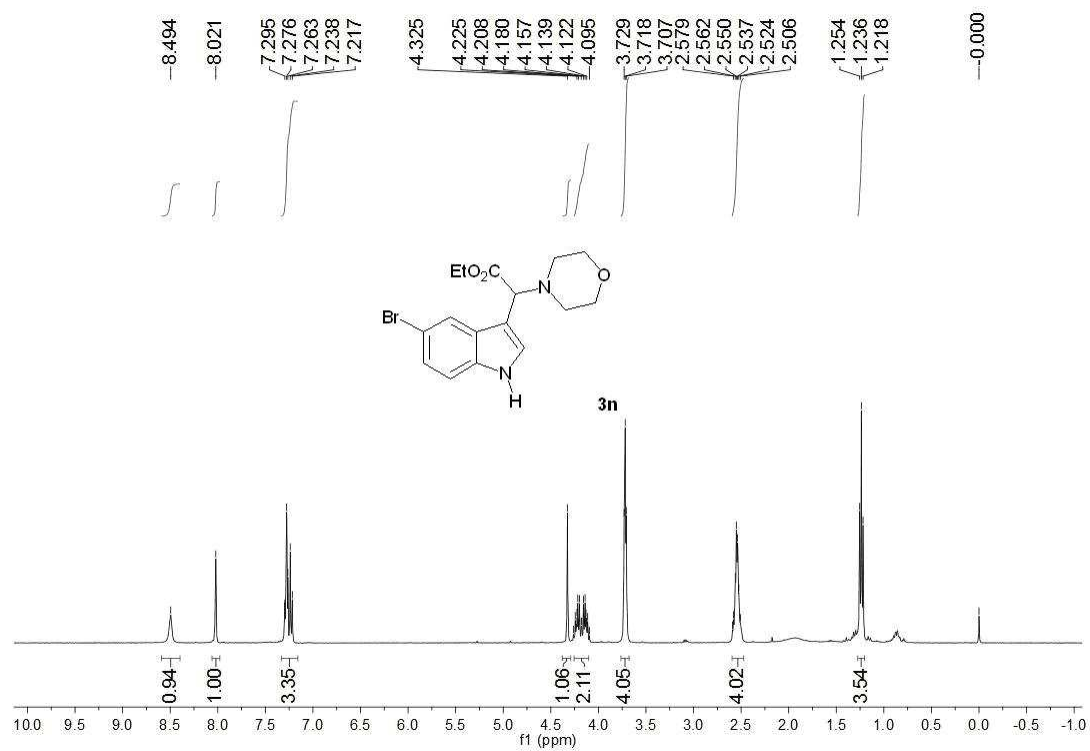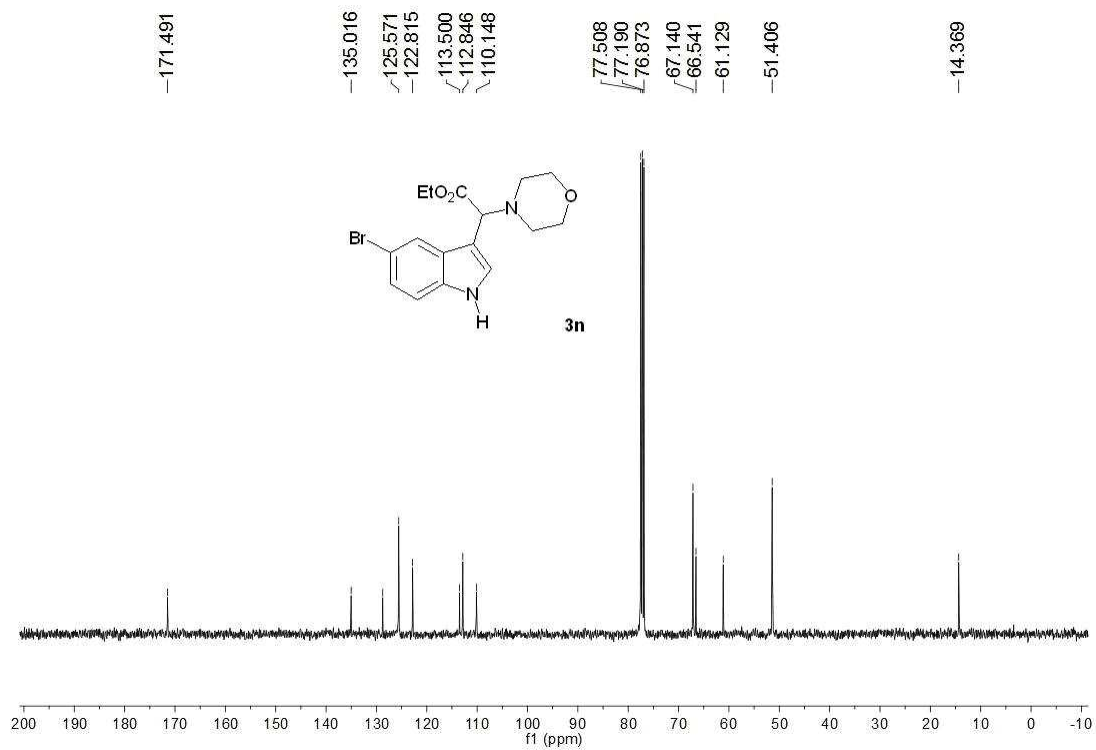

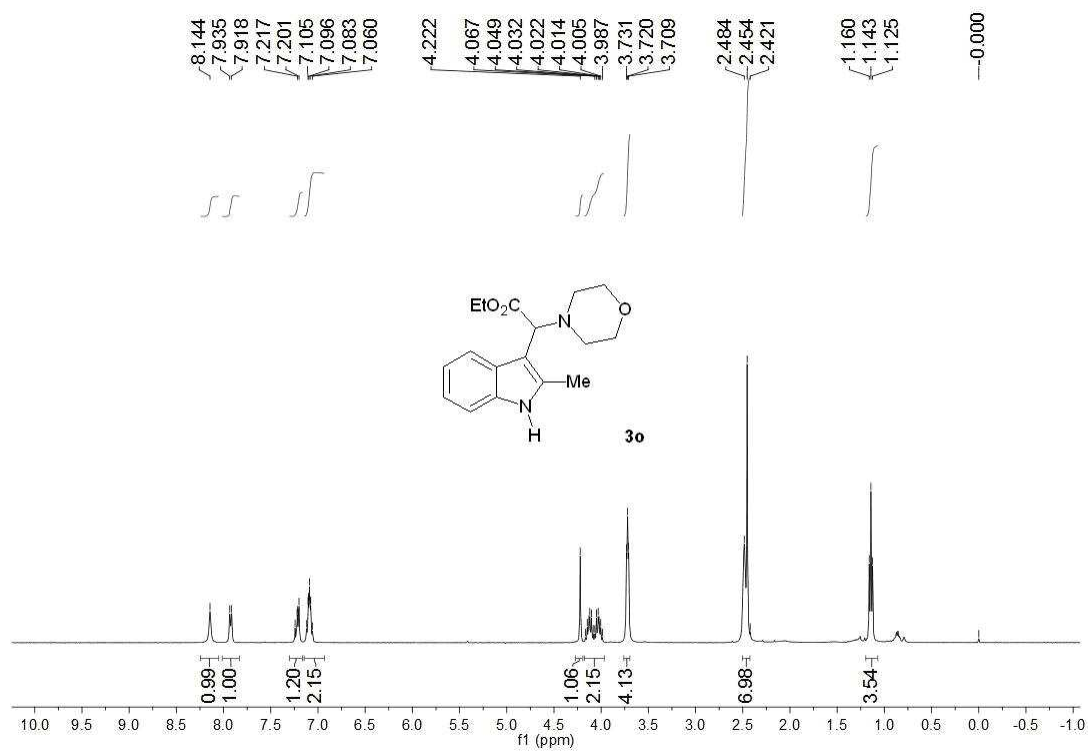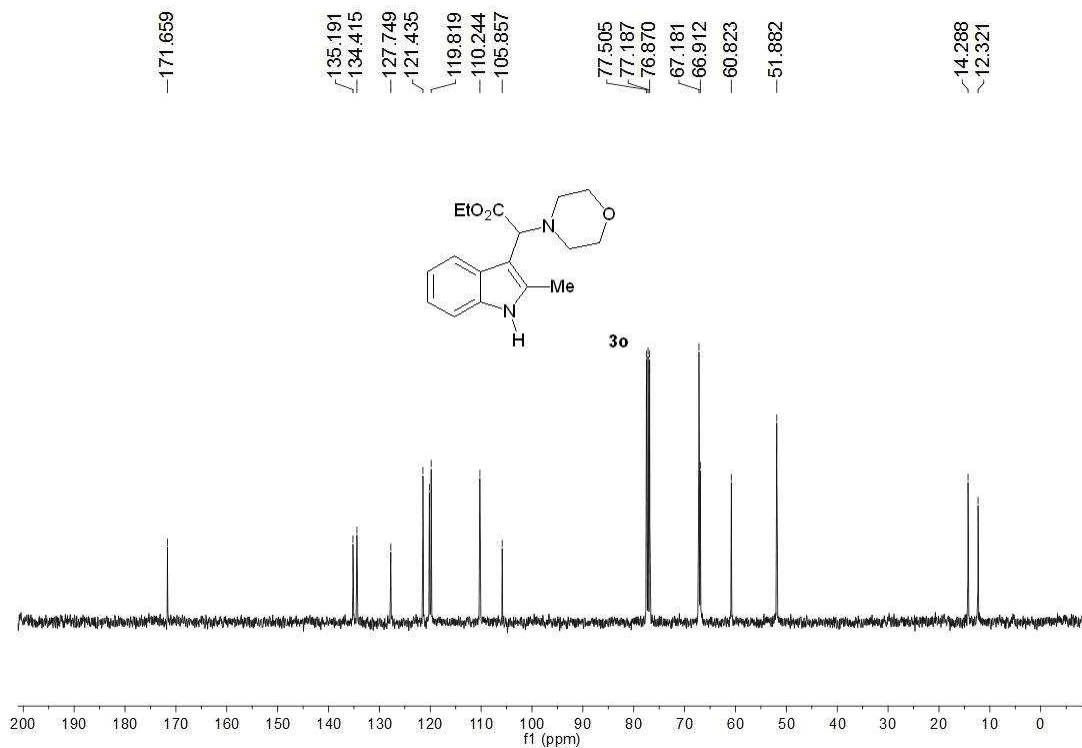



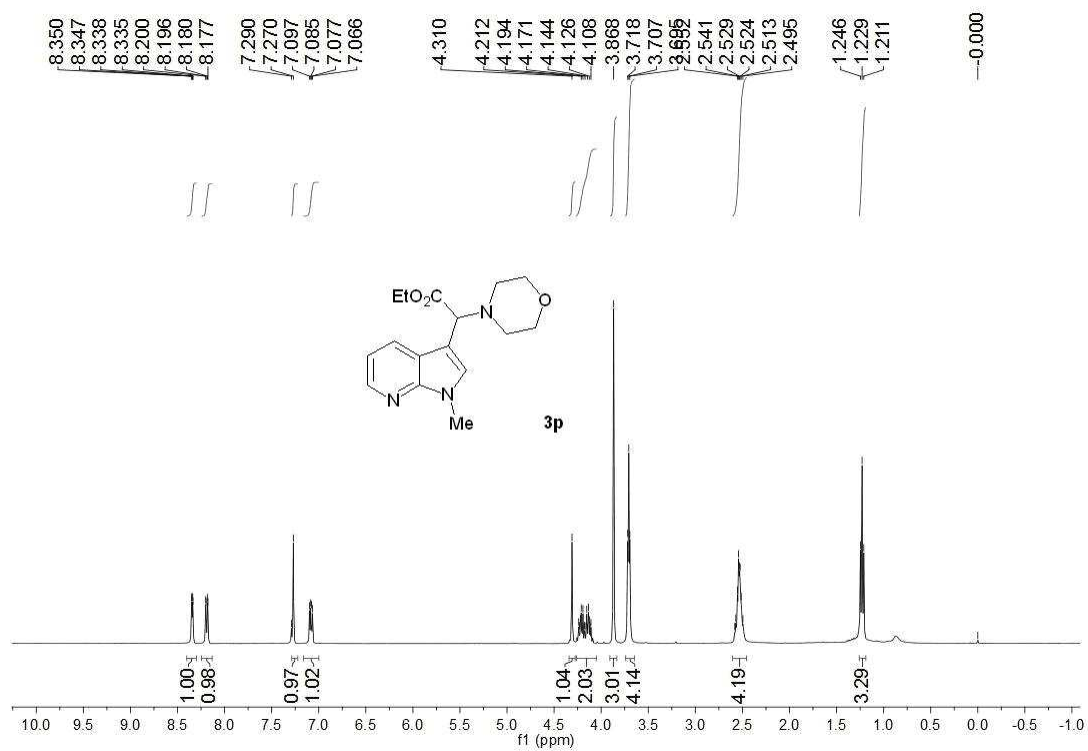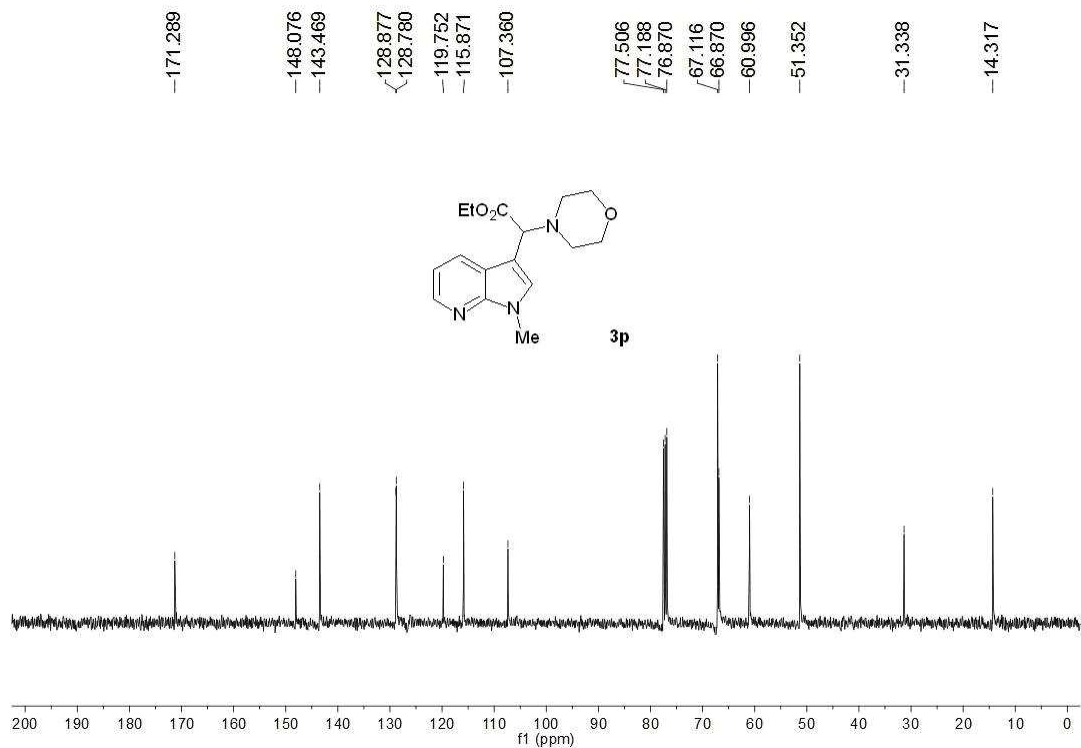

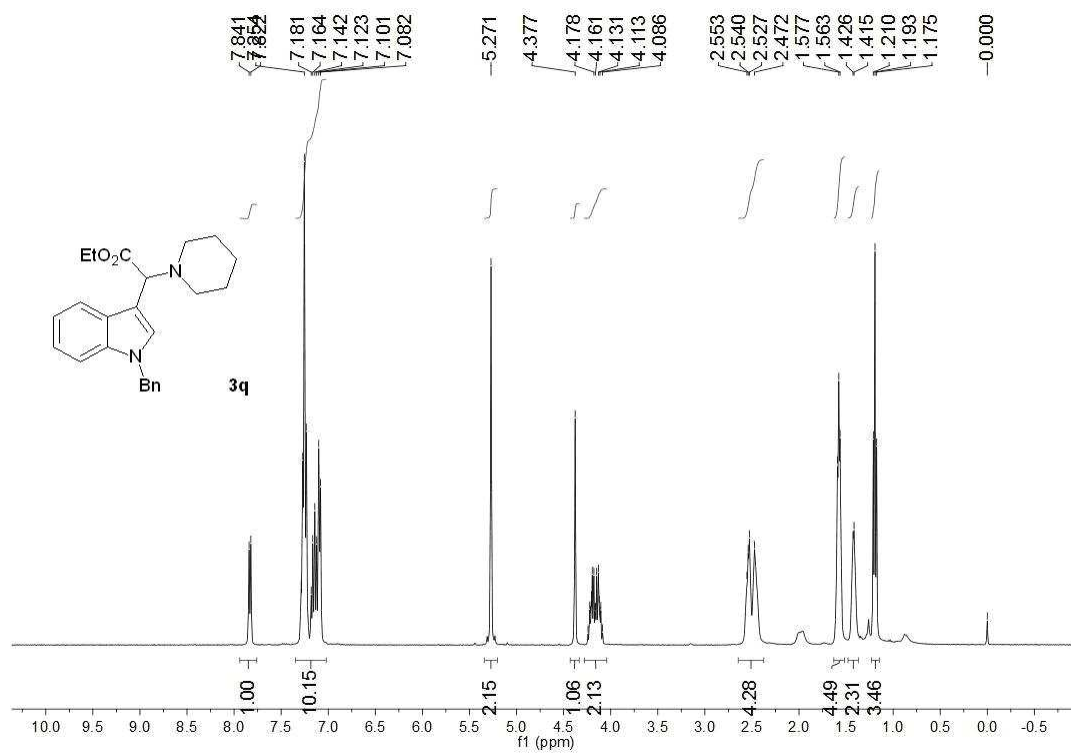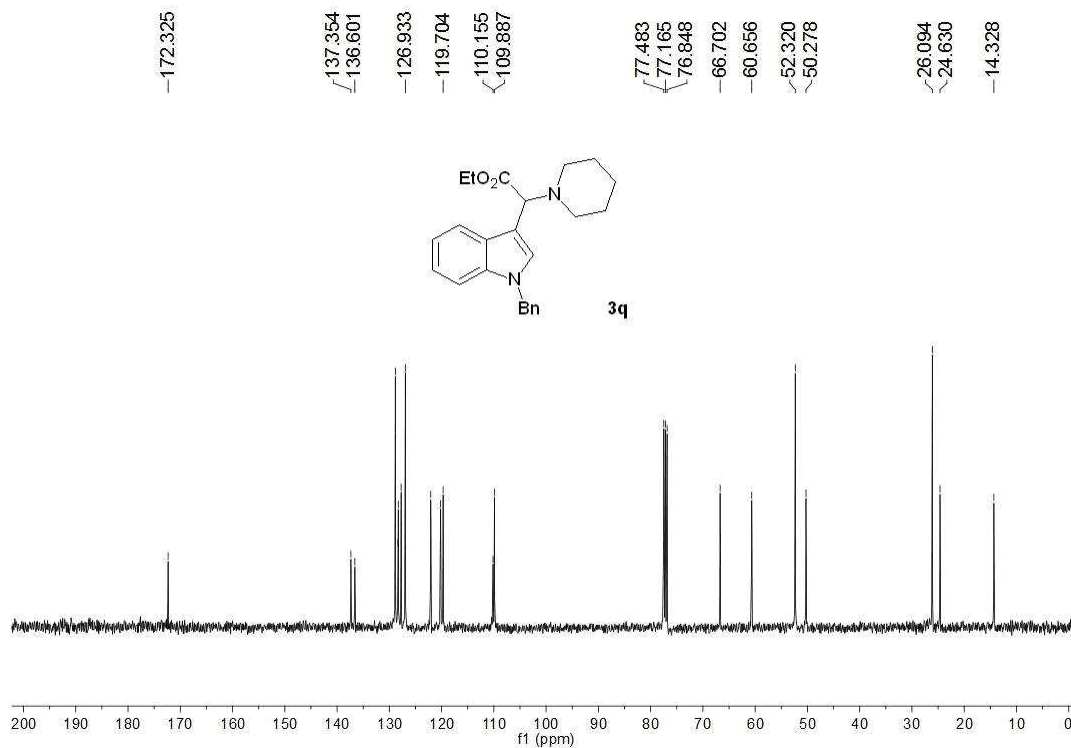

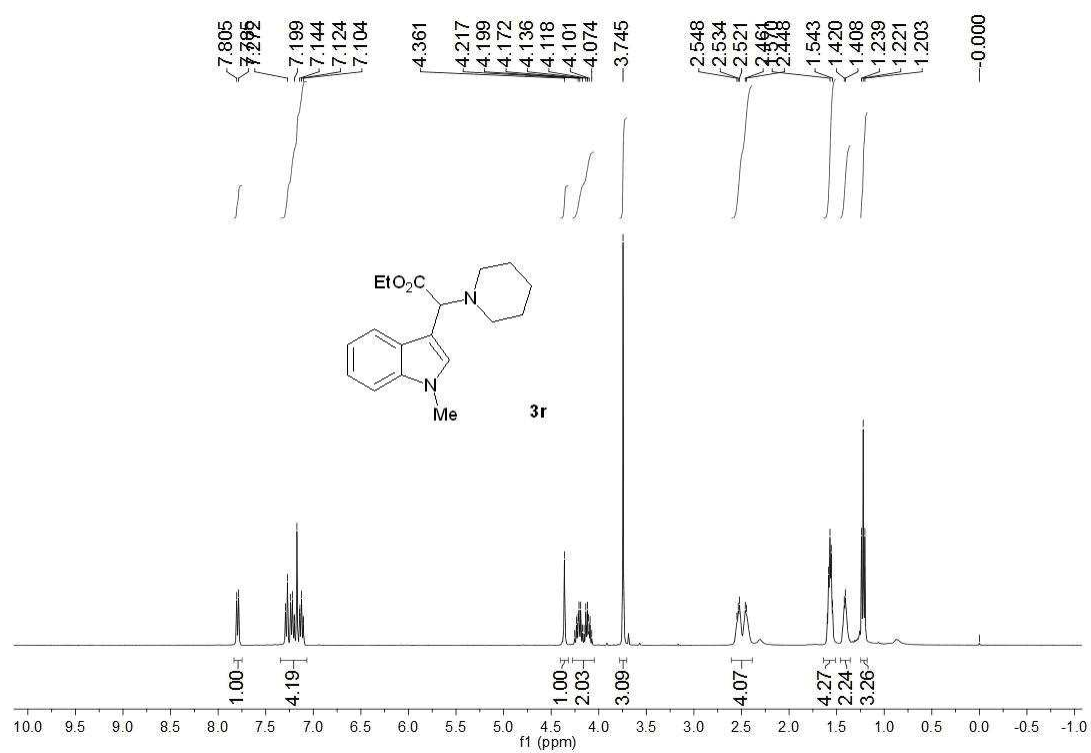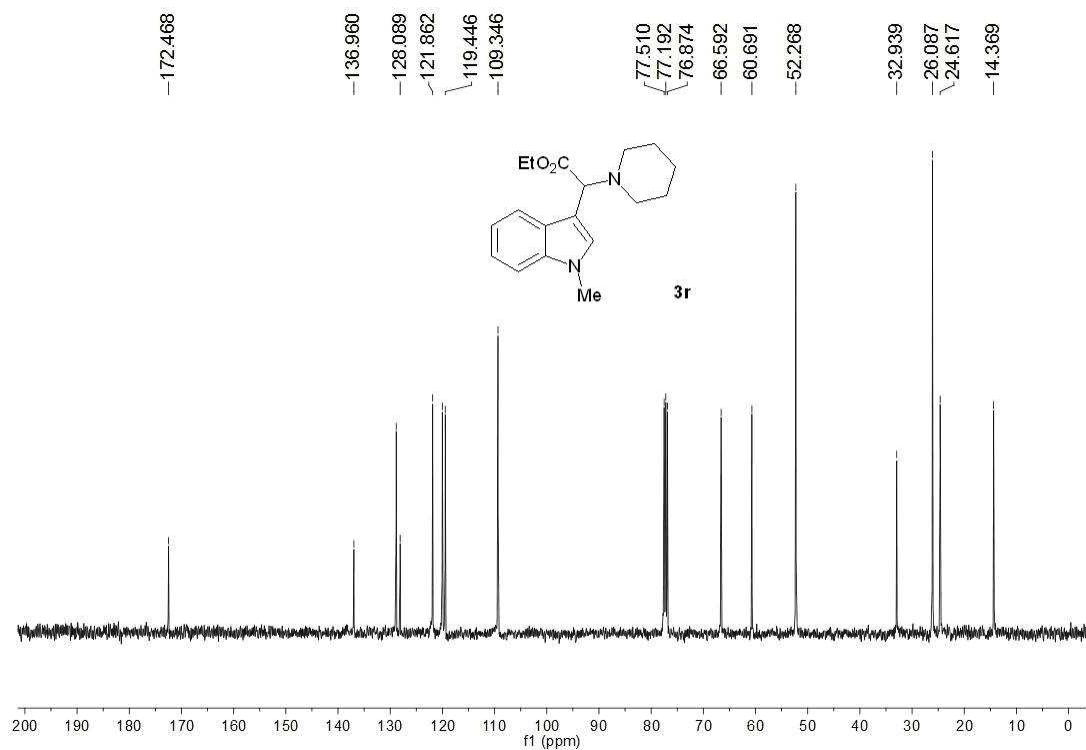

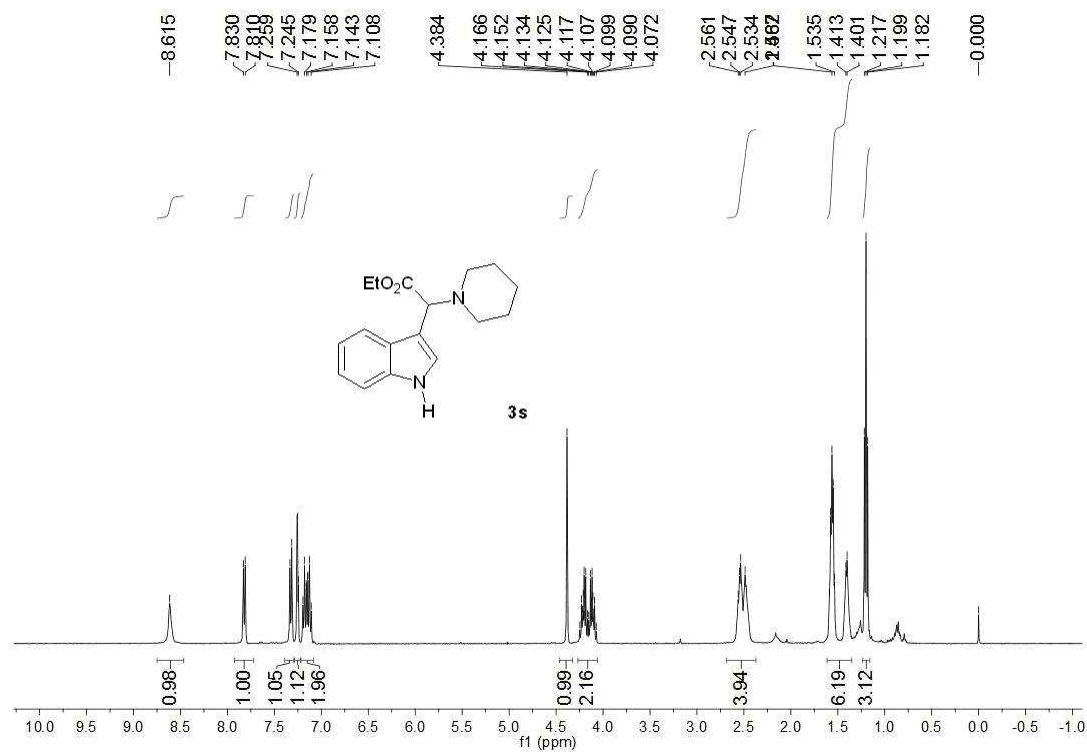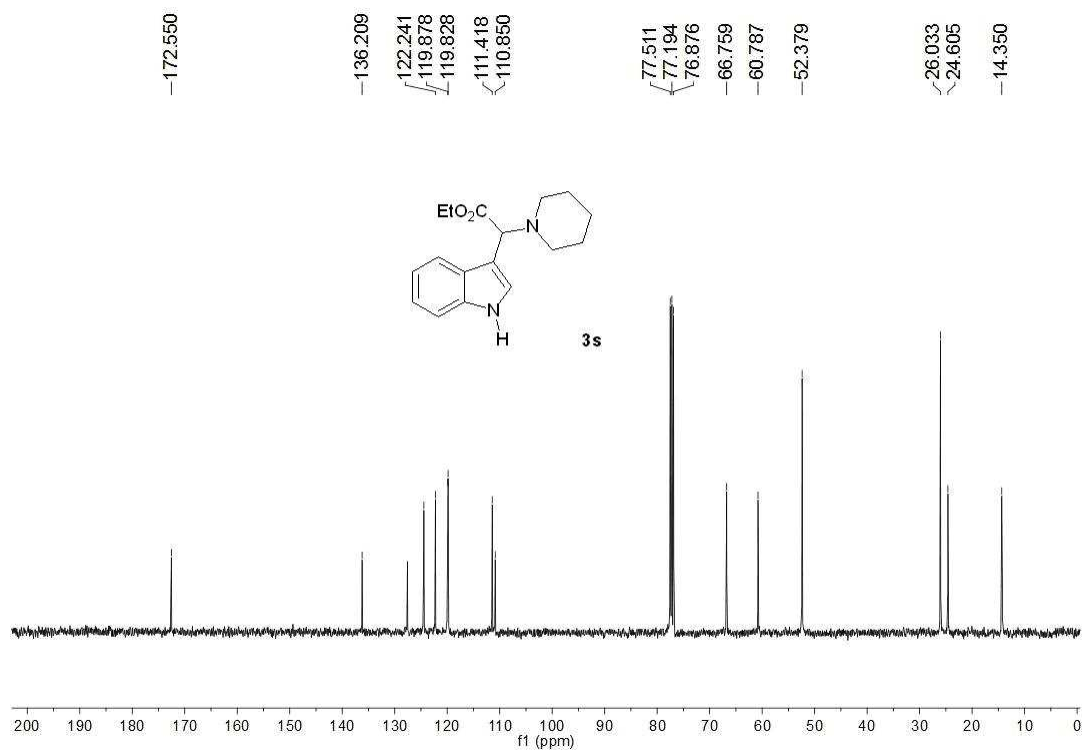

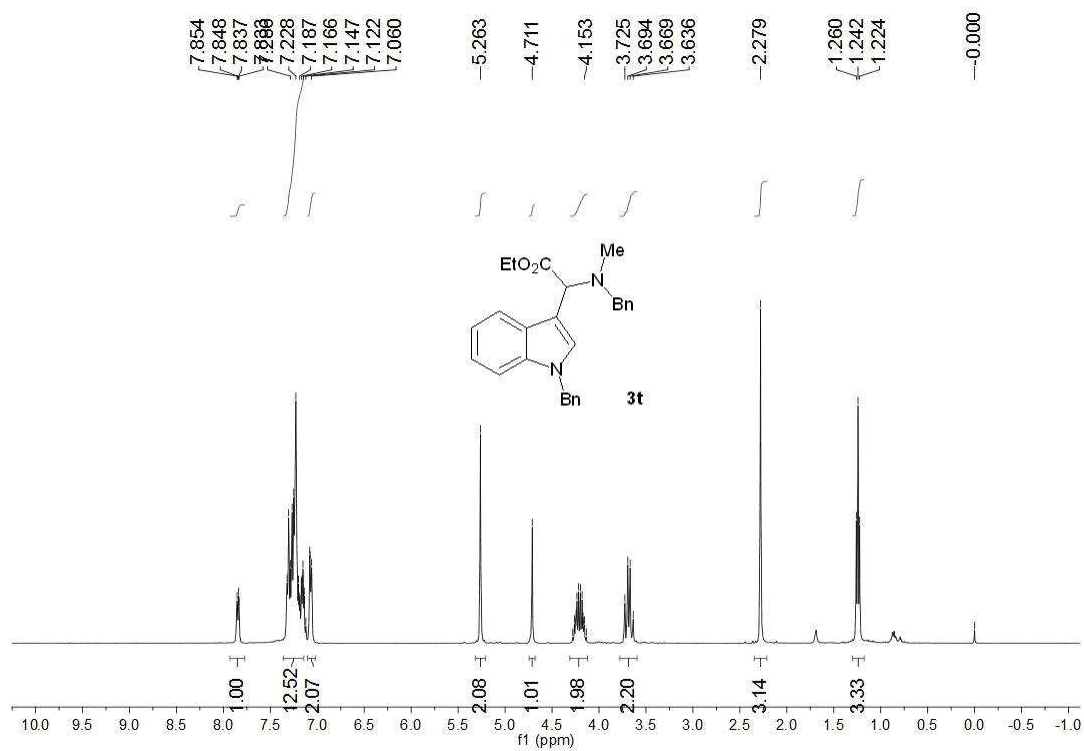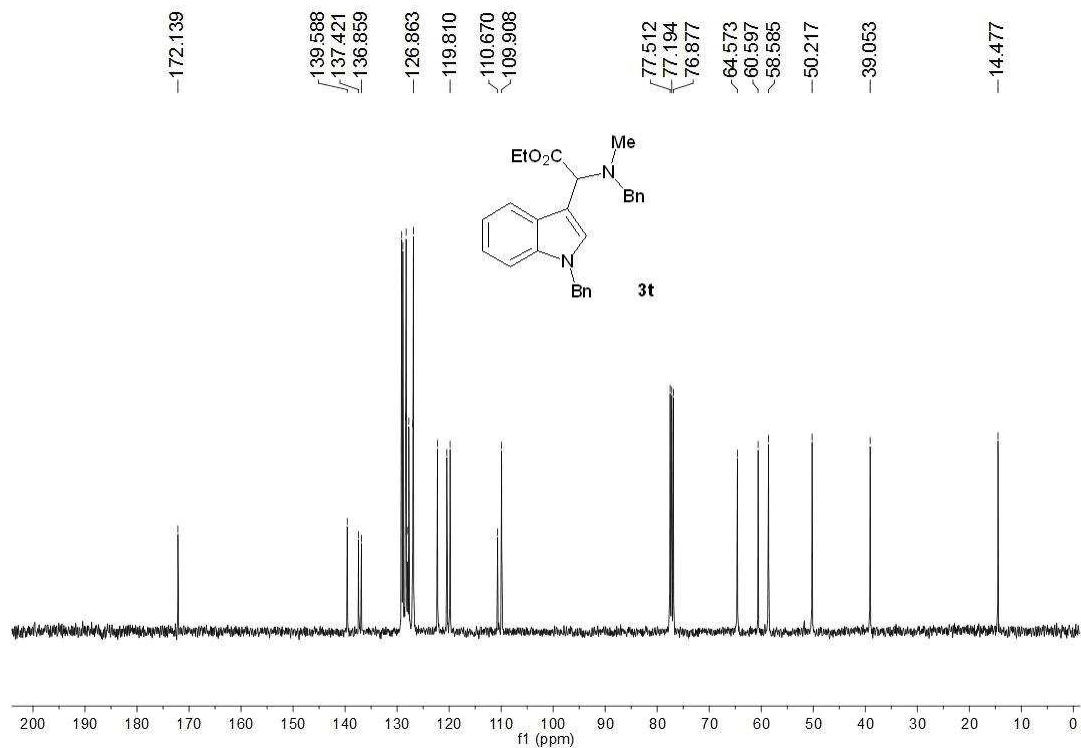

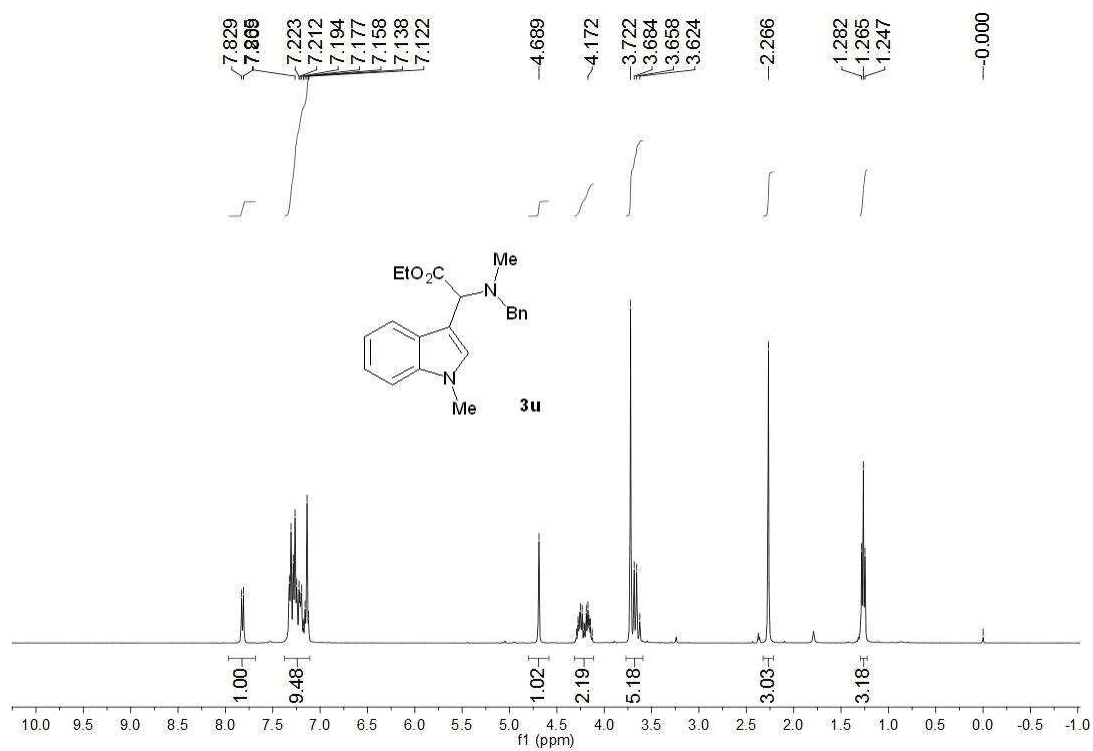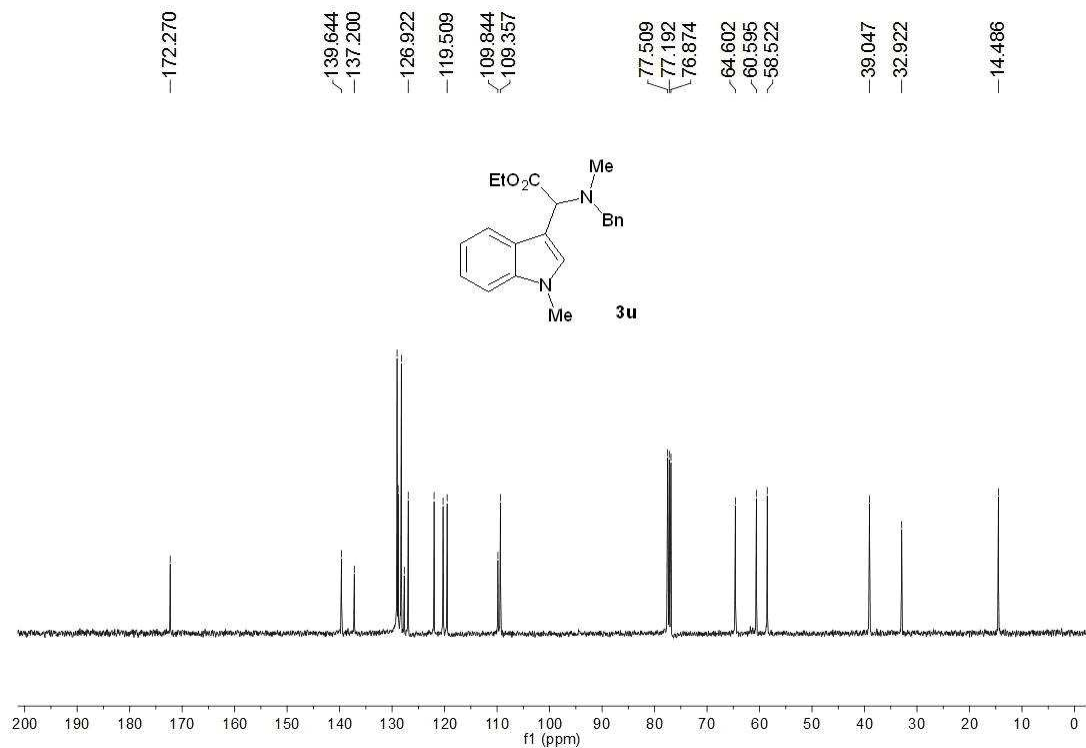

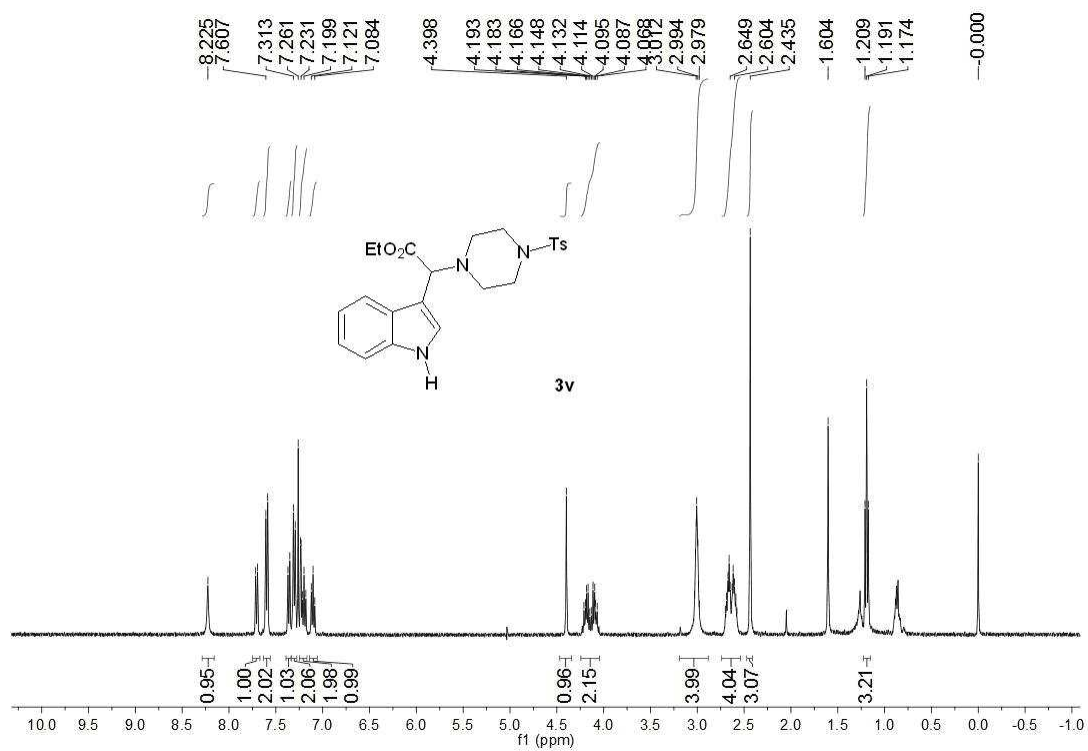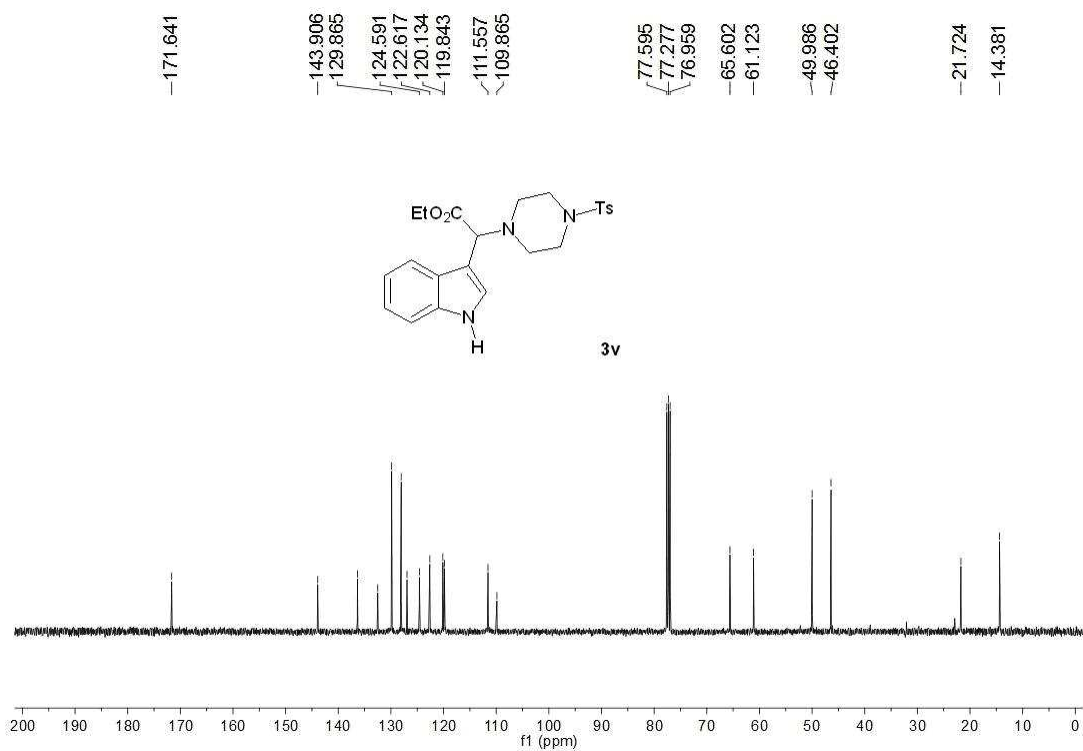

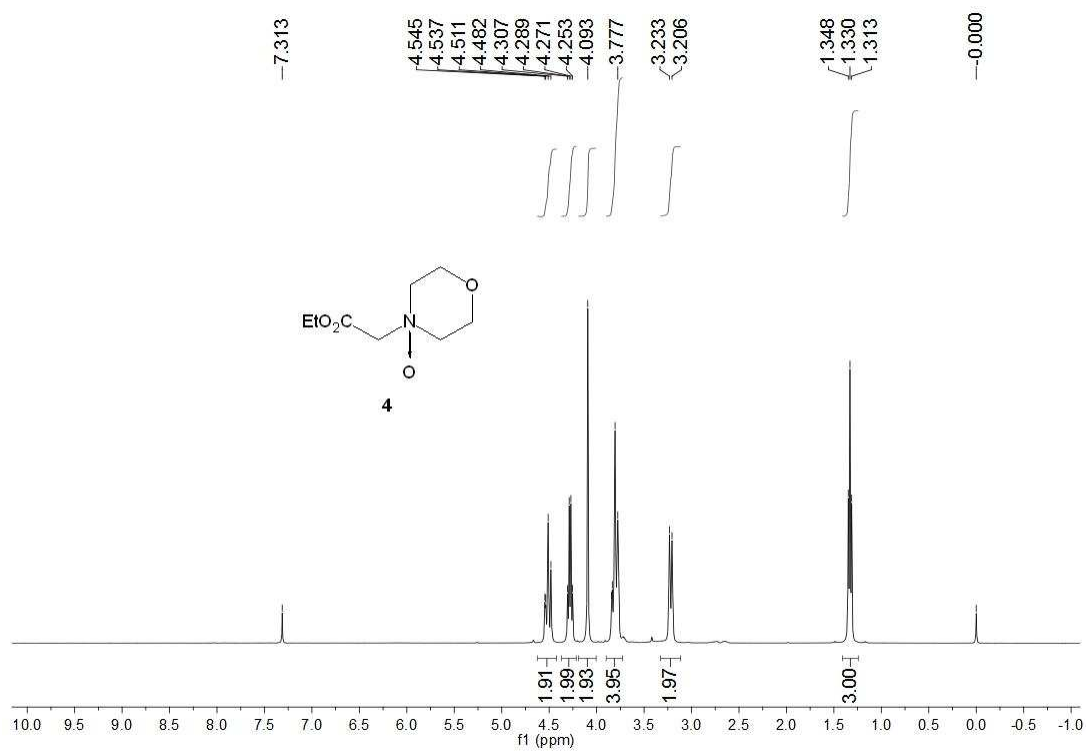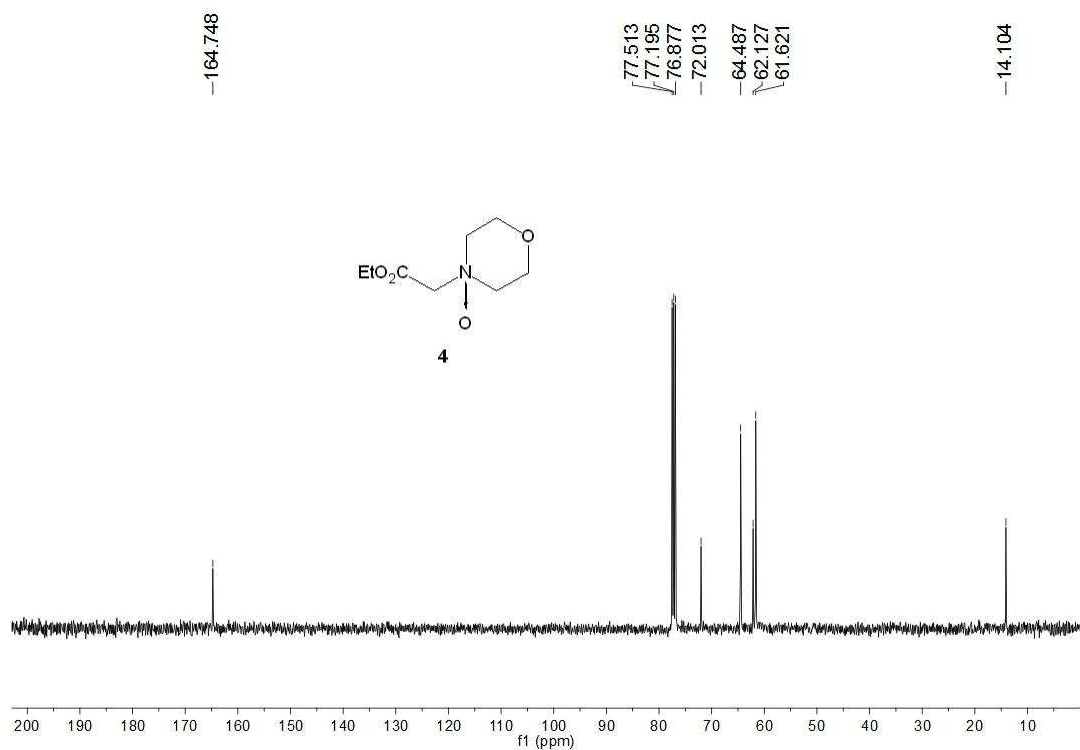

Supplement: Supplementary file 1 [file 4138207]
